# Supplementary material for: Homoleptic hexa- and penta-coordinated gallium(i) amide complexes of ruthenium and molybdenum
Source: Royal Society of Chemistry journal article supplement (doi:10.1039/d4dt00823e), 2024-01-01
Supplement: d4dt00823e1.pdf [file d4dt00823e1.pdf]

## SUPPORTING INFORMATION

### Homoleptic Hexa and Penta Coordinated Gallium(I) Amide Complexes of Ruthenium and Molybdenum

Raphael Bühler<sup>#a</sup>, Richard J. J. Weininger<sup>#a</sup>, Johannes Stephan<sup>a</sup>, Maximilian Muhr<sup>a</sup>, Balasai M.-T. Bock<sup>a</sup>, Christian Gemel<sup>a</sup>, Roland A. Fischer<sup>a\*</sup>

<sup>#</sup>These authors contributed equally to this work

\*Email: roland.fischer@tum.de

Chair of Inorganic and Metal-Organic Chemistry, Technical University of Munich, School of Natural Sciences, Department of Chemistry Lichtenbergstr. 4, 85748 Garching and Catalysis Research Center, Ernst-Otto-Fischer-Straße 1, 85748 Garching.

## Table of Content

|                                                                                                     |    |
|-----------------------------------------------------------------------------------------------------|----|
| General Remarks.....                                                                                | 3  |
| Analytical Methods.....                                                                             | 3  |
| Computerized Analysis of Mass Spectra.....                                                          | 3  |
| Continuous Shape Measure <sup>2</sup> .....                                                         | 4  |
| Comprehensive listing of homoleptic and closely related [M(ER*) <sub>n</sub> ] complexes known..... | 5  |
| NMR Data.....                                                                                       | 9  |
| IR Data.....                                                                                        | 12 |
| LIFDI-Mass Spectra.....                                                                             | 14 |
| Crystallography.....                                                                                | 17 |
| SC-XRD structure report for compound <b>1</b> .....                                                 | 17 |
| SC-XRD structure report for compound <b>2</b> .....                                                 | 22 |
| Calculated XYZ Coordinates.....                                                                     | 33 |
| [Ru(GaTMP) <sub>5</sub> ].....                                                                      | 33 |
| [Mo(GaTMP) <sub>6</sub> ].....                                                                      | 37 |

## General Remarks

Unless stated otherwise, all synthetic manipulations were carried out using standard Schlenk techniques under an atmosphere of argon 4.6 purified by BTC-catalyst and dried over 3 Å molecular sieves or in a glovebox under an atmosphere of purified argon. All reactions were carried out in standardized Schlenk flasks and tubes which were rinsed with 1,1,1,3,3,3-hexamethyldisilyzane (HMDS), heated with a heat gun to 650 °C and cooled under vacuum argon. All synthesis of light sensitive compounds were performed under the red light. All solvents were carefully dried over molecular sieves and deuterated solvents were degassed prior to their use. All non-dried solvents used were distilled prior to their use. All the reagents were purchased from commercial sources and used as such without further purification.

## Analytical Methods

NMR spectra were recorded on a Bruker Avance III 400US (1H, 400 MHz; 13C 101MHz). Chemical shifts are given relative to TMS and were referenced to the residual solvent peak as internal standards. Chemical shifts are reported in parts per million, downfield shifted from TMS, and are consecutively reported as position ( $\delta$ H or  $\delta$ C), relative integral, multiplicity (s = singlet, t = triplet, and m = multiplet) and assignment. FT-IR spectra were measured on an ATR setup with a Bruker Alpha FTIR spectrometer under an inert gas atmosphere in a glove-box. The mass spectra were taken using a Linden CMS LIFDI as ionization source and a ThermoFisher Scientific Exactive Plus Orbitrap as detector. The sample application was performed via a fumed silica capillary from a glovebox under an argon atmosphere to enable the measurement of highly air-sensitive compounds. The recorded mass spectra were evaluated using the FreeStyle 1.3 program from ThermoFisher Scientific and a fitting program developed by *Dr. Christian Gemel* details of which are outlined below. Reference isotope patterns were simulated using the enviPat Web application.<sup>1</sup>

## Computerized Analysis of Mass Spectra

The general procedure for computerized peak identification in LIFDI-MS involves utilizing a Java computer program (Java 11, openjdk-1.11.0). The program's fundamental principles and workflow are outlined below.

To begin spectrum analysis, the program employs automated pattern recognition, identifying local maxima above a specified threshold value (which users can adjust, defaulting to 1% of the highest peak in the spectrum) as peaks. These peaks are then grouped automatically into peak groups and subsequently into isotopic patterns through a recursive process. The algorithm initiates at the highest remaining peak in the peak list and searches both left and right for peaks with an exact  $m/z$  shift of  $1/z$  from each other, within a user-defined error range ( $\epsilon$ ). Users input the charge  $z$  of the ions (defaulting to 1) and the recursive process terminates when no peaks remain in the peak list.

The resulting list comprises peak groups, which are considered isotopic patterns if they contain a minimum number of peaks (defaulting to 5, user-adjustable).

For pattern analysis, users provide a list of potential fragments by loading a file containing all conceivable fragments the observed ions may consist of (such as metal atoms, ligands, solvents, etc.). The program generates weight matches for each pattern by recursively combining these fragments into ions. All possible fragment combinations up to the  $m/z$  value of the respective pattern are calculated, using the pattern centroid (intensity-weighted average,  $(m/z)_{\text{centroid}}$ ) as the experimental average weight. Acceptable fragment combinations have a molar weight ( $M_w$ ) falling within the range:  $(m/z)_{\text{centroid}} - 2.1 < M_w < (m/z)_{\text{centroid}} + 4.1$ . The subtraction of 2.1 accounts for a possible loss of 2 hydrogen atoms and the addition of 4.1 accounts for the possibility of up to four additional hydrogens, which are not part of the input fragments (accounting for dehydrogenation or hydrogenation/protonation during ionization).

As the list of fragment formulas is often extensive, a "sieving" step is conducted. Isotopic patterns for each fragment are calculated, and an "offset" value is determined by comparing exact  $m/z$  values of calculated and experimental patterns. Only patterns with an average offset value below a specified threshold (defaulting to 0.2, user-adjustable) are further considered. The program then computes the goodness of fit (GoF) value between experimental and calculated patterns, and vice versa, using least squares fitting resulting in a total GoF, ranging between 0 (no common peaks) and 1 (identical patterns).

In the output file, each pattern is listed with possible pattern matches and their corresponding final GoF values. Additionally, users can visually compare patterns to their calculated counterparts.

### **Continuous Shape Measure<sup>2</sup>**

The method of continuous shape measure uses the  $N$  vertices of an experimentally determined coordination polyhedron normalized and centered in the origin of a three-dimensional cartesian coordinate system as their position vectors  $Q_i$  ( $i = 1, 2, 3, \dots, N$ ). These are compared to the position vectors  $P_i$  ( $i = 1, 2, 3, \dots, N$ ) of the  $N$  vertices of an ideal reference polyhedron that is equally centered and normalized. This is expressed as

$$S_Q(P) = \frac{1}{N} \min \sum_{i=1}^N |\vec{Q}_i - \vec{P}_i|^2 \times 100$$

A value of  $S_Q(P) = 0$  thus represents the exact ideal shape, with increasing values indicating increasing distortions. This value was calculated from most ideal superimposition, determined by minimizing the distance between the superimposed polyhedral vertices by a numerical rotation algorithm.  $S_Q(P)$  thus is the global minimum of these permutations.

In order to identify the cartesian coordinates of two polyhedra with minimized average distances of their vertices, a Java program has been used (Java 15, openjdk-15). The program takes as input the cartesian coordinates of two polyhedra, both centered at the origin. The program then freely rotates (and also stretches/shrinks on demand) one of the two polyhedra, finally locating the coordinates with minimized distances between the vertices of the two polyhedra in a recursive process.

The code for both programs can be obtained from the authors on request.

### **Comprehensive listing of homoleptic and closely related $[M(ER^*)_n]$ complexes known**

In an endeavor to explore the then arising topic of isolobality between CO and E-R ligands (E = Al, Ga, In)(R = C(SiMe<sub>3</sub>)<sub>3</sub>, 1,2,3,4,5-pentamethylcyclopentadienyl (Cp\*)) to gain access to a new class of mononuclear intermetallic complexes, *W. Uhl et. al.* in 1998 published the first mononuclear homoleptic transition metal (TM)-ER<sub>x</sub> compound Ni(InC(SiMe<sub>3</sub>)<sub>3</sub>)<sub>4</sub>.<sup>3</sup> The homologous Ni(GaC(SiMe<sub>3</sub>)<sub>3</sub>)<sub>4</sub> followed shortly after further proving the concept beyond Indium.<sup>4</sup> Pt(InC(SiMe<sub>3</sub>)<sub>3</sub>)<sub>4</sub> provided the first example of a homoleptic 3<sup>rd</sup> row TM-ER<sub>(x)</sub> compound.<sup>5</sup> During this time *P. Jutzi et. al.* presented Ni(GaCp\*)<sub>4</sub>, thus providing a vital broadening of the field.<sup>6</sup> With Pd(GaCp\*)<sub>4</sub>, Pd(InC(SiMe<sub>3</sub>)<sub>3</sub>)<sub>4</sub> and Pt(GaCp\*)<sub>4</sub> the homologous Ni-Pd-Pt row was completed by *R. A. Fischer et. al.* in 2003.<sup>7</sup> The homologous homoleptic, mononuclear compounds of AlCp\*, Ni(AlCp\*)<sub>4</sub> and Pd(AlCp\*)<sub>4</sub> established Al within the row of E-R ligands.<sup>8, 9</sup> The more electron rich metals yielded the respective cationic, homoleptic compounds Zn(GaCp)<sub>4</sub>[BArF]<sub>2</sub> ([BArF] = Tetrakis[3,5-bis(trifluoromethyl)phenyl]borate), Cu(GaCp\*)<sub>4</sub>[BArF] and Ag(GaCp\*)<sub>4</sub>[BPh<sub>4</sub>].<sup>10, 11</sup> Fe(AlCp\*)<sub>5</sub> and Ru(AlCp\*)<sub>5</sub> are the first examples of homoleptic C-H activated isomers of TM-E-R complexes outside the d<sup>10</sup> group with more than four group 13 metals coordinated.<sup>12</sup> Though not strictly homoleptic (GaCp\*)<sub>4</sub>Rh(MeGa(η<sup>1</sup>-Cp\*)) and (GaCp\*)<sub>4</sub>Rh((OTf)Ga(η<sup>1</sup>-Cp\*)) (OTf = trifluoromethanesulfonate) continue a trend of higher coordination numbers.<sup>13, 14</sup> The haptotropically shifted, halogen bridged (GaCp\*)<sub>3</sub>Ru(GaCl(η<sup>1</sup>-Cp\*))<sub>2</sub>(Ga<sub>2</sub>(μ-Cl)(η<sup>1</sup>-Cp\*))<sub>2</sub> provided the first hexa group 13 coordinated compound within the family.<sup>15</sup> The highest unhalogenated coordination number within the group stands at six provided by the only haptotropically shifted Mo(GaCp\*)<sub>6</sub>.<sup>14, 16</sup>

Another group of mononuclear homoleptic intermetallic TM-E-R compounds is based on Ga(DDP) (DDP = 2-((2,6-diisopropylphenyl)amino)-4-((2,6-diisopropylphenyl)imino)-2-pentene). The first one Au(Ga·(THF)(DDP))<sub>2</sub>[BArF] was also presented by *R. A. Fischer et. al.* in 2006.<sup>17</sup> This was followed up by Zn(Ga(Me)(DDP))<sub>2</sub>.<sup>10</sup> With Hg(Ga(SC<sub>6</sub>F<sub>5</sub>)(DDP))<sub>2</sub> the first homoleptic TM-E-R compound of Mercury was obtained.<sup>18</sup> Cu(Ga(DDP))<sub>2</sub>[OTf] then was the first and as of now only homoleptic complex of the series where the Ga(DDP) was only bound to the central TM atom.<sup>19</sup> Interest in this

class of compounds has not abated, just in 2022, *J. Okuda et. al.* published their work around  $\text{Zn}(\text{GaH}(\text{DDP}))_2$ .<sup>20</sup> This group of compounds generally does not exceed a coordination number of two E-R. However *C. Jones et. al.* reported a coordination number of three with their NHC-analogous  $\text{Ga}[\text{N}(\text{Ar})]_2\text{CNCy}_2$  (Ar =  $\text{C}_6\text{H}_3\text{Pr}_{2-2,6}$ ) (Cy = cyclohexyl) in the homoleptic  $\text{Pt}(\text{Ga}[\text{N}(\text{Ar})]_2\text{CNCy}_2)_3$ .<sup>21</sup>

Table S 1: List of homoleptic and closely related  $[\text{M}(\text{ER}^*)_n]$  compounds known and sorted by coordination number of central atom M and element E

| <b>Compounds with central atom coordination number = 2</b>         |                                                                                                                              |
|--------------------------------------------------------------------|------------------------------------------------------------------------------------------------------------------------------|
| $\text{Au}(\text{Ga}\cdot(\text{THF})(\text{DDP}))_2[\text{BArF}]$ | A. Kempter, C. Gemel, N. J. Hardman, R. A. Fischer, <i>Inorg. Chem.</i> , 2006, <b>45</b> , 3133                             |
| $\text{Hg}(\text{Ga}(\text{SC}_6\text{F}_5)(\text{DDP}))_2$        | G. Prabusankar, C. Gemel, M. Winter, R. W. Seidel, R. A. Fischer, <i>Chem. Eur. J.</i> , 2010, <b>16</b> , 6041              |
| $\text{Zn}(\text{GaH}(\text{DDP}))_2$                              | L. J. Morris, T. Rajeshkumar, L. Maron, J. Okuda, <i>Chem. Eur. J.</i> , 2022, <b>28</b> , e202201480,                       |
| $\text{Cu}(\text{Ga}(\text{DDP}))_2[\text{OTf}]$                   | G. Prabusankar, S. Gonzalez-Gallardo, A. Doddi, C. Gemel, M. Winter, R. A. Fischer, <i>Eur. J. Inorg. Chem.</i> , 2010, 4415 |
| $\text{Zn}(\text{Ga}(\text{Me})(\text{DDP}))_2$                    | A. Kempter, C. Gemel, T. Cadenbach, R. A. Fischer, <i>Inorg. Chem.</i> , 2007, <b>46</b> , 9481                              |
| <b>Compounds with central atom coordination number = 3</b>         |                                                                                                                              |
| $\text{Pt}(\text{Ga}[\text{N}(\text{Ar})]_2\text{CNCy}_2)_3$       | S. P. Green, C. Jones, A. Stasch, <i>Inorg. Chem.</i> , 2007, <b>46</b> , 11                                                 |
| <b>Compounds with central atom coordination number = 4</b>         |                                                                                                                              |
| $\text{Pt}(\text{GaCp}^*)_4$                                       | C. Gemel, T. Steinke, D. Weiss, M. Cokoja, M. Winter, R. A. Fischer, <i>Organometallics</i> , 2003, <b>22</b> , 2705         |
| $\text{Pd}(\text{GaCp}^*)_4$                                       | C. Gemel, T. Steinke, D. Weiss, M. Cokoja, M. Winter, R. A. Fischer, <i>Organometallics</i> , 2003, <b>22</b> , 2705         |
| $\text{Ni}(\text{GaCp}^*)_4$                                       | P. Jutzi, B. Neumann, L. O. Schebaum, A. Stammler, H.-G. Stammler, <i>Organometallics</i> , 1999, <b>18</b> , 4462           |
| $\text{Ag}(\text{GaCp}^*)_4[\text{BPh}_4]$                         | T. Bollermann, A. Puls, C. Gemel, T. Cadenbach, R. A. Fischer, <i>Dalton Trans.</i> , 2009, 1372                             |
| $\text{Zn}(\text{GaCp}^*)_4[\text{BAr}^{\text{F}}]_2$              | A. Kempter, C. Gemel, T. Cadenbach, R. A. Fischer, <i>Inorg. Chem.</i> , 2007, <b>46</b> , 9481                              |

|                                                                            |                                                                                                                                                                                                                                                                                                          |
|----------------------------------------------------------------------------|----------------------------------------------------------------------------------------------------------------------------------------------------------------------------------------------------------------------------------------------------------------------------------------------------------|
| $\text{Cu}(\text{GaCp}^*)_4[\text{BAR}^{\text{F}}]$                        | T. Bollermann, A. Puls, C. Gemel, T. Cadenbach, R. A. Fischer, <i>Dalton Trans.</i> , 2009, 1372                                                                                                                                                                                                         |
| $\text{Ni}(\text{GaC}(\text{TMS})_3)_4$                                    | W. Uhl, M. Benter, S. Melle, W. Saak, G. Frenking, J. Uddin, <i>Organometallics</i> , 1999, <b>18</b> , 3778                                                                                                                                                                                             |
| $\text{Pd}(\text{AlCp}^*)_4$                                               | B. Buchin, T. Steinke, C. Gemel, T. Cadenbach, R. A. Fischer, <i>Z. anorg. allg. Chem.</i> , 2005, <b>631</b> , 2756                                                                                                                                                                                     |
| $\text{Ni}(\text{AlCp}^*)_4$                                               | B. Buchin, T. Steinke, C. Gemel, T. Cadenbach, R. A. Fischer, <i>Z. anorg. allg. Chem.</i> , 2005, <b>631</b> , 2756                                                                                                                                                                                     |
| $\text{Ni}(\text{InC}(\text{TMS})_3)_4$                                    | W. Uhl, M. Pohlmann, R. Wartchow, <i>Angew. Chem. Int. Ed.</i> , 1998, <b>37</b> , 961<br><br>W. Uhl, M. Benter, S. Melle, W. Saak, G. Frenking, J. Uddin, <i>Organometallics</i> , 1999, <b>18</b> , 3778                                                                                               |
| $\text{Pt}(\text{InC}(\text{TMS})_3)_4$                                    | W. Uhl, S. Melle, <i>Z. anorg. allg. Chem.</i> , 2000, <b>626</b> , 2043                                                                                                                                                                                                                                 |
| $\text{Pd}(\text{InC}(\text{TMS})_3)_4$                                    | C. Gemel, T. Steinke, D. Weiss, M. Cokoja, M. Winter, R. A. Fischer, <i>Organometallics</i> , 2003, <b>22</b> , 2705                                                                                                                                                                                     |
| <b>Compounds with central atom coordination number = 5</b>                 |                                                                                                                                                                                                                                                                                                          |
| $(\text{GaCp}^*)_4\text{Rh}(\text{Ga}(\text{O}_3\text{SCF}_3)\text{Cp}^*)$ | T. Bollermann, T. Cadenbach, C. Gemel, K. Freitag, M. Molon, V. Gwildies, R. A. Fischer, <i>Inorg. Chem.</i> , 2011, <b>50</b> , 5808                                                                                                                                                                    |
| $(\text{GaCp}^*)_4\text{Rh}(\text{MeGa}(\eta^1\text{-Cp}^*))$              | T. Cadenbach, C. Gemel, D. Zacher, R. A. Fischer, <i>Angew. Chem. Int. Ed.</i> , 2008, <b>47</b> , 3438                                                                                                                                                                                                  |
| $\text{Fe}(\text{AlCp}^*)_5$<br>(C-H activated)                            | T. Steinke, M. Cokoja, C. Gemel, A. Kempter, A. Krapp, G. Frenking, U. Zennek, R. A. Fischer, <i>Angew. Chem. Int. Ed.</i> , 2005, <b>44</b> , 2943                                                                                                                                                      |
| $\text{Ru}(\text{AlCp}^*)_5$<br>(C-H activated)                            | T. Steinke, M. Cokoja, C. Gemel, A. Kempter, A. Krapp, G. Frenking, U. Zennek, R. A. Fischer, <i>Angew. Chem. Int. Ed.</i> , 2005, <b>44</b> , 2943                                                                                                                                                      |
| <b>Compounds with central atom coordination number = 6</b>                 |                                                                                                                                                                                                                                                                                                          |
| $\text{Ru}(\text{GaCp}^*)_4(\text{ClGaCp}^*)_2$                            | B. Buchin, C. Gemel, A. Kempter, T. Cadenbach, R. A. Fischer, <i>Inorg. Chim. Acta</i> , 2006, <b>359</b> , 4833                                                                                                                                                                                         |
| $\text{Mo}(\text{GaCp}^*)_6$<br>(Haptotropic Shifted)                      | T. Cadenbach, T. Bollermann, C. Gemel, I. Fernandez, M. von Hopffgarten, G. Frenking, R. A. Fischer, <i>Angew. Chem. Int. Ed.</i> , 2008, <b>47</b> , 9150,<br><br>T. Bollermann, T. Cadenbach, C. Gemel, K. Freitag, M. Molon, V. Gwildies, R. A. Fischer, <i>Inorg. Chem.</i> , 2011, <b>50</b> , 5808 |

## References

1. M. Loos, C. Gerber, F. Corona, J. Hollender and H. Singer, *Anal. Chem.*, 2015, **87**, 5738-5744.
2. M. Molon, C. Gemel, M. von Hopffgarten, G. Frenking and R. A. Fischer, *Inorg. Chem.*, 2011, **50**, 12296-12302.
3. W. Uhl, M. Pohlmann and R. Wartchow, *Angew. Chem. Int. Ed.*, 1998, **37**, 961-963.
4. W. Uhl, M. Benter, S. Melle, W. Saak, G. Frenking and J. Uddin, *Organometallics*, 1999, **18**, 3778-3780.
5. W. Uhl and S. Melle, *Z. anorg. allg. Chem.*, 2000, **626**, 2043-2045.
6. P. Jutzi, B. Neumann, L. O. Schebaum, A. Stammler and H.-G. Stammler, *Organometallics*, 1999, **18**, 4462-4464.
7. C. Gemel, T. Steinke, D. Weiss, M. Cokoja, M. Winter and R. A. Fischer, *Organometallics*, 2003, **22**, 2705-2710.
8. T. Steinke, C. Gemel, M. Cokoja, M. Winter and R. A. Fischer, *Angew. Chem. Int. Ed.*, 2004, **43**, 2299-2302.
9. B. Buchin, T. Steinke, C. Gemel, T. Cadenbach and R. A. Fischer, *Z. anorg. allg. Chem.*, 2005, **631**, 2756-2762.
10. A. Kempter, C. Gemel, T. Cadenbach and R. A. Fischer, *Inorg. Chem.*, 2007, **46**, 9481-9487.
11. T. Bollermann, A. Puls, C. Gemel, T. Cadenbach and R. A. Fischer, *Dalton Trans.*, 2009, DOI: 10.1039/B815319A, 1372-1377.
12. T. Steinke, M. Cokoja, C. Gemel, A. Kempter, A. Krapp, G. Frenking, U. Zenneck and R. A. Fischer, *Angew. Chem. Int. Ed.*, 2005, **44**, 2943-2946.
13. T. Cadenbach, C. Gemel, D. Zacher and R. A. Fischer, *Angew. Chem. Int. Ed.*, 2008, **47**, 3438-3441.
14. T. Bollermann, T. Cadenbach, C. Gemel, K. Freitag, M. Molon, V. Gwildies and R. A. Fischer, *Inorg. Chem.*, 2011, **50**, 5808-5814.
15. B. Buchin, C. Gemel, A. Kempter, T. Cadenbach and R. A. Fischer, *Inorg. Chim. Acta.*, 2006, **359**, 4833-4839.
16. T. Cadenbach, T. Bollermann, C. Gemel, I. Fernandez, M. von Hopffgarten, G. Frenking and R. A. Fischer, *Angew. Chem. Int. Ed.*, 2008, **47**, 9150-9154.
17. A. Kempter, C. Gemel, N. J. Hardman and R. A. Fischer, *Inorg. Chem.*, 2006, **45**, 3133-3138.
18. G. Prabusankar, C. Gemel, M. Winter, R. W. Seidel and R. A. Fischer, *Chem. Eur. J.*, 2010, **16**, 6041-6047.
19. G. Prabusankar, S. Gonzalez-Gallardo, A. Doddi, C. Gemel, M. Winter and R. A. Fischer, *Eur. J. Inorg. Chem.*, 2010, **2010**, 4415-4418.
20. L. J. Morris, T. Rajeshkumar, L. Maron and J. Okuda, *Chem. Eur. J.*, 2022, **28**, e202201480.
21. S. P. Green, C. Jones and A. Stasch, *Inorg. Chem.*, 2007, **46**, 11-13.



# NMR Data

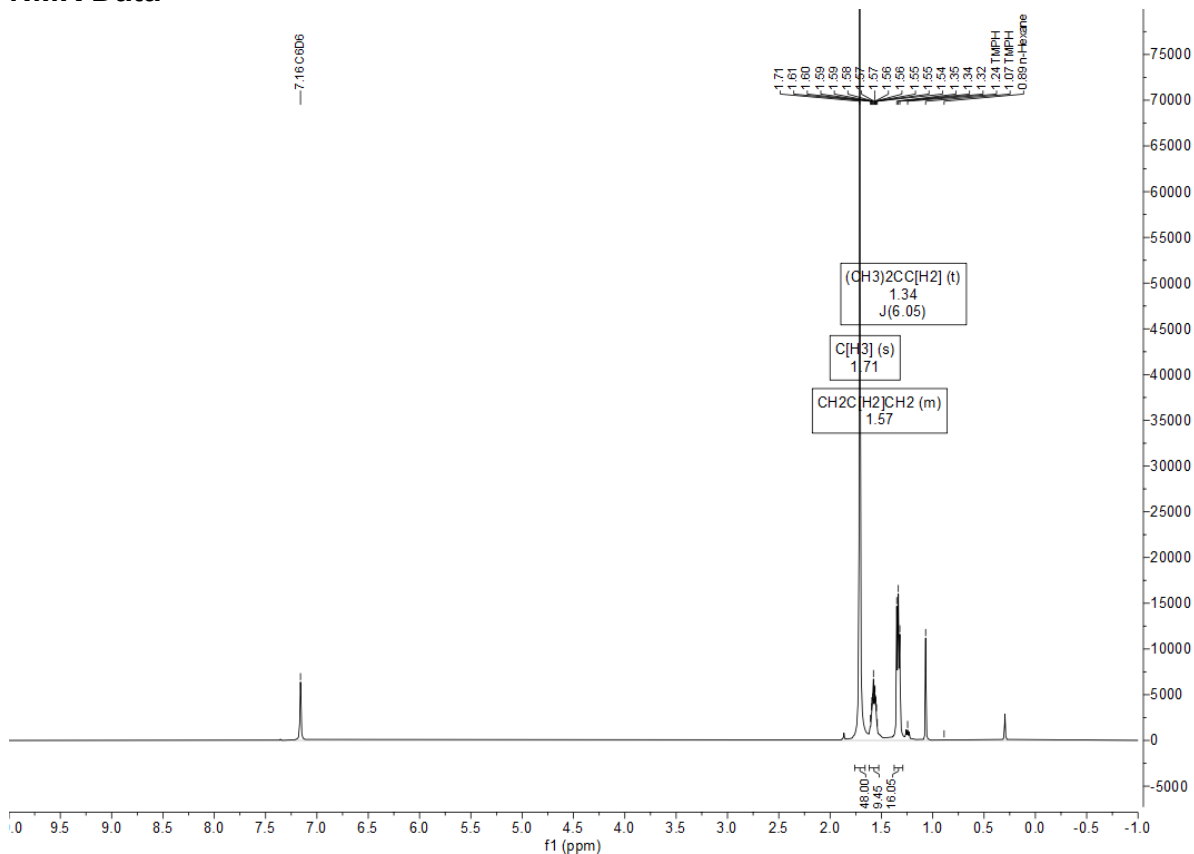

Figure S 1: <sup>1</sup>H-NMR Spectrum of 1 in benzene-*d*<sub>6</sub>.

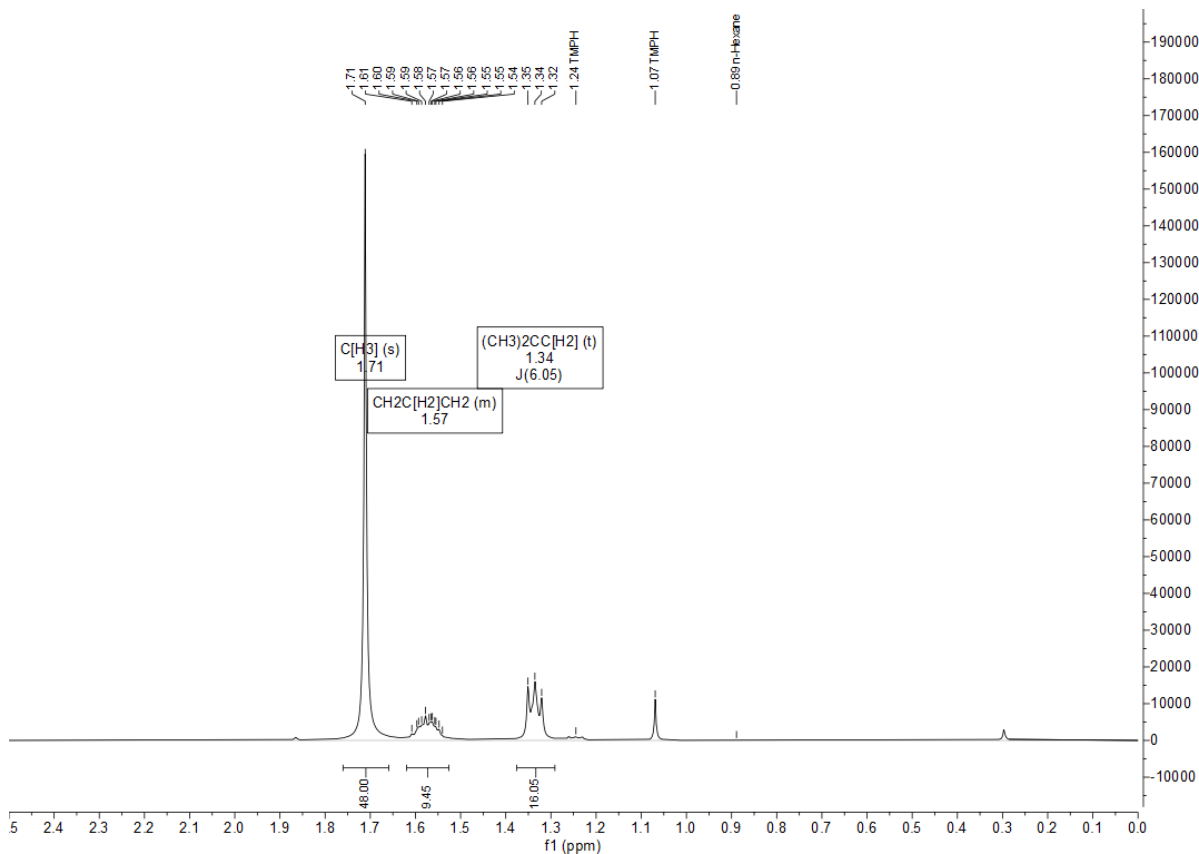

Figure S 2: <sup>1</sup>H-NMR Spectrum of 1 in benzene-*d*<sub>6</sub> from 2.50 ppm to 0.00 ppm.

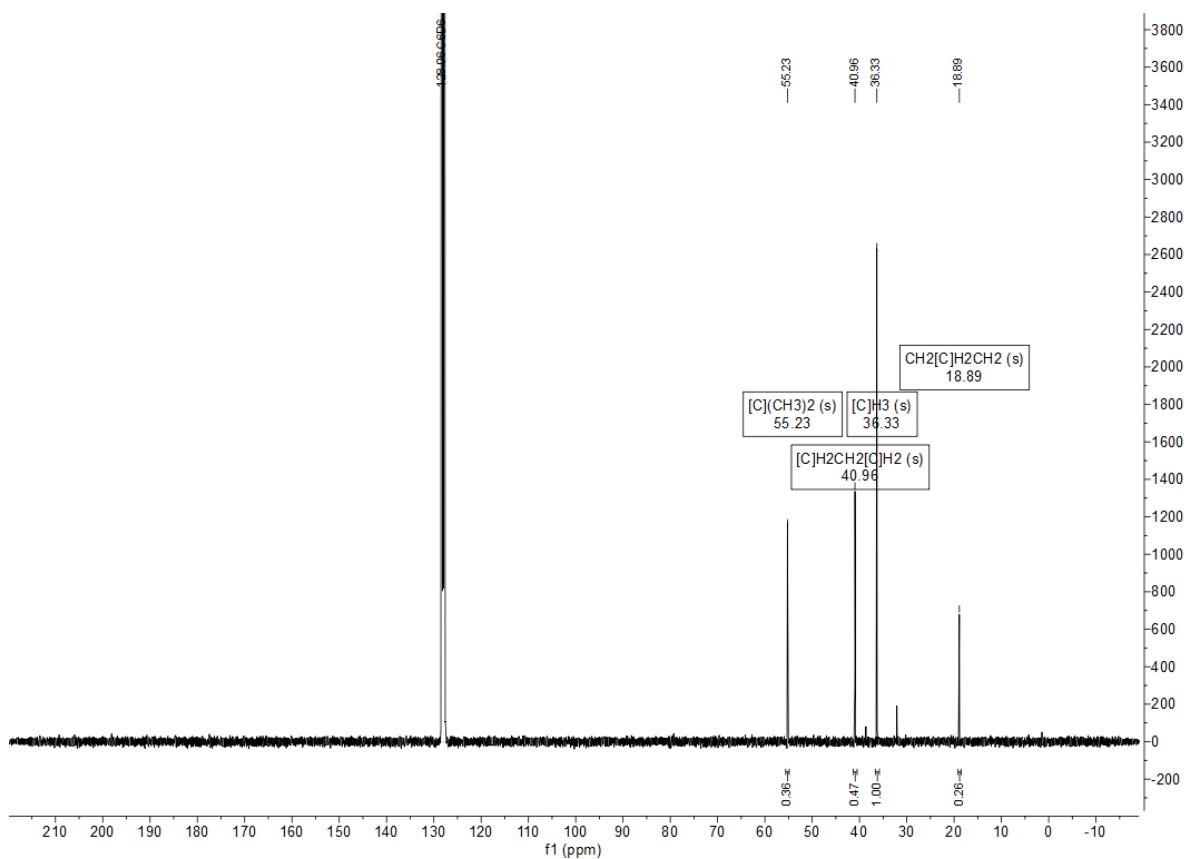

Figure S 3:  $^{13}\text{C}$ -NMR Spectrum of **1** in benzene- $d_6$ .

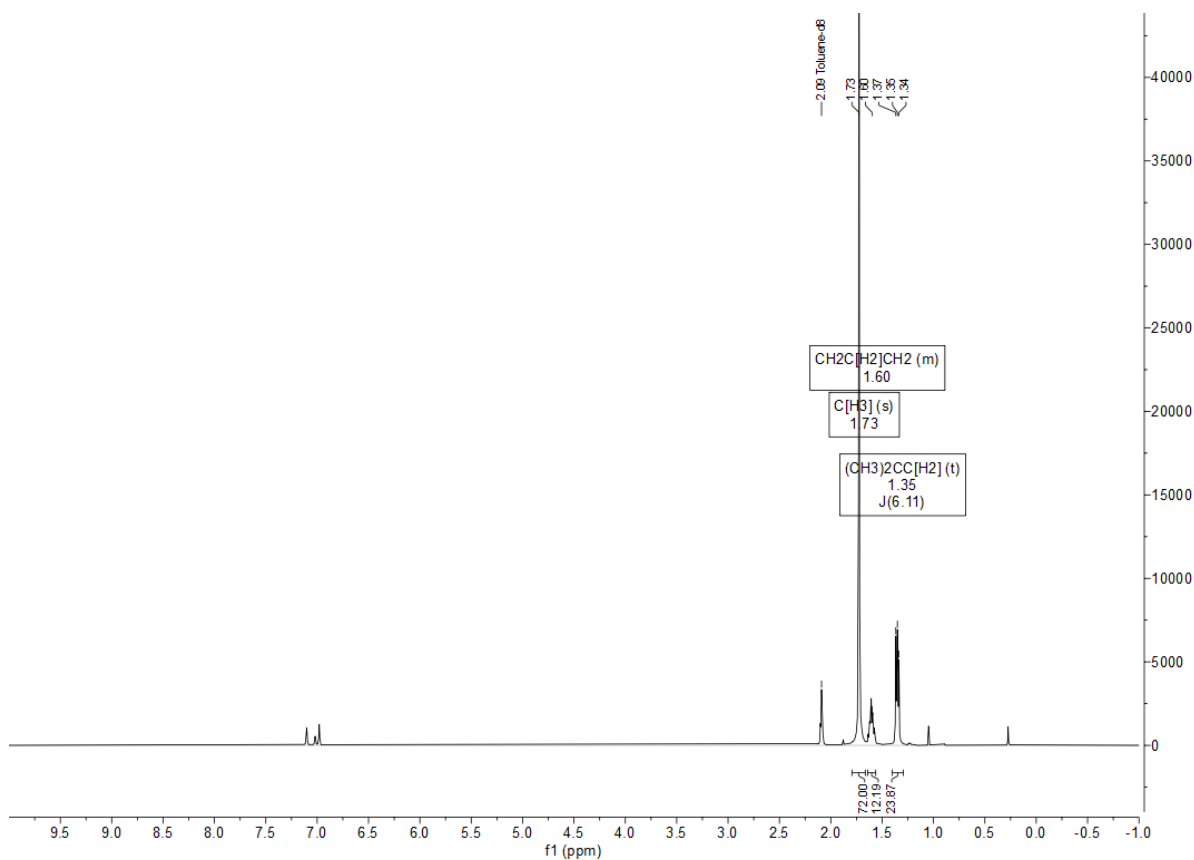

Figure S 4:  $^1\text{H}$ -NMR Spectrum of **2** in toluene- $d_8$  from 2.50 ppm to 0.00 ppm.

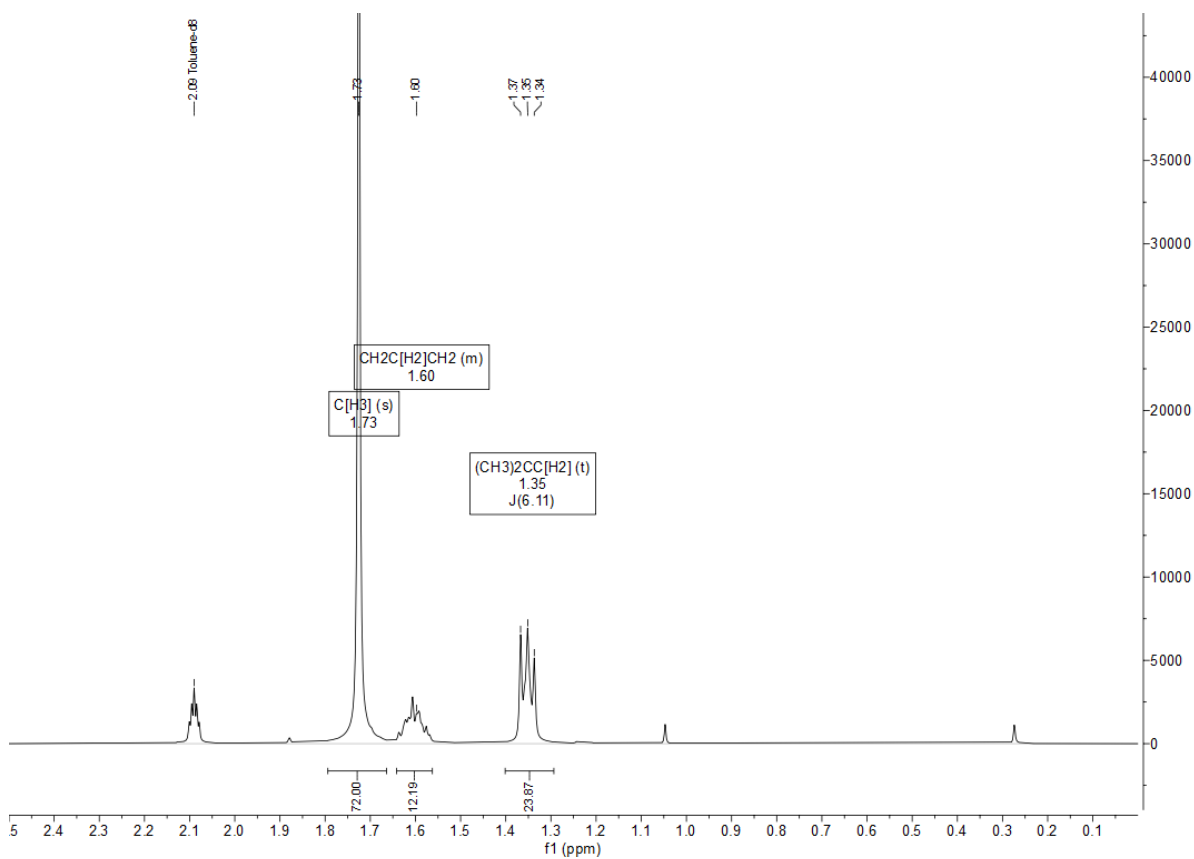

Figure S 5:  $^1\text{H-NMR}$  Spectrum of **2** in toluene- $d_8$ .

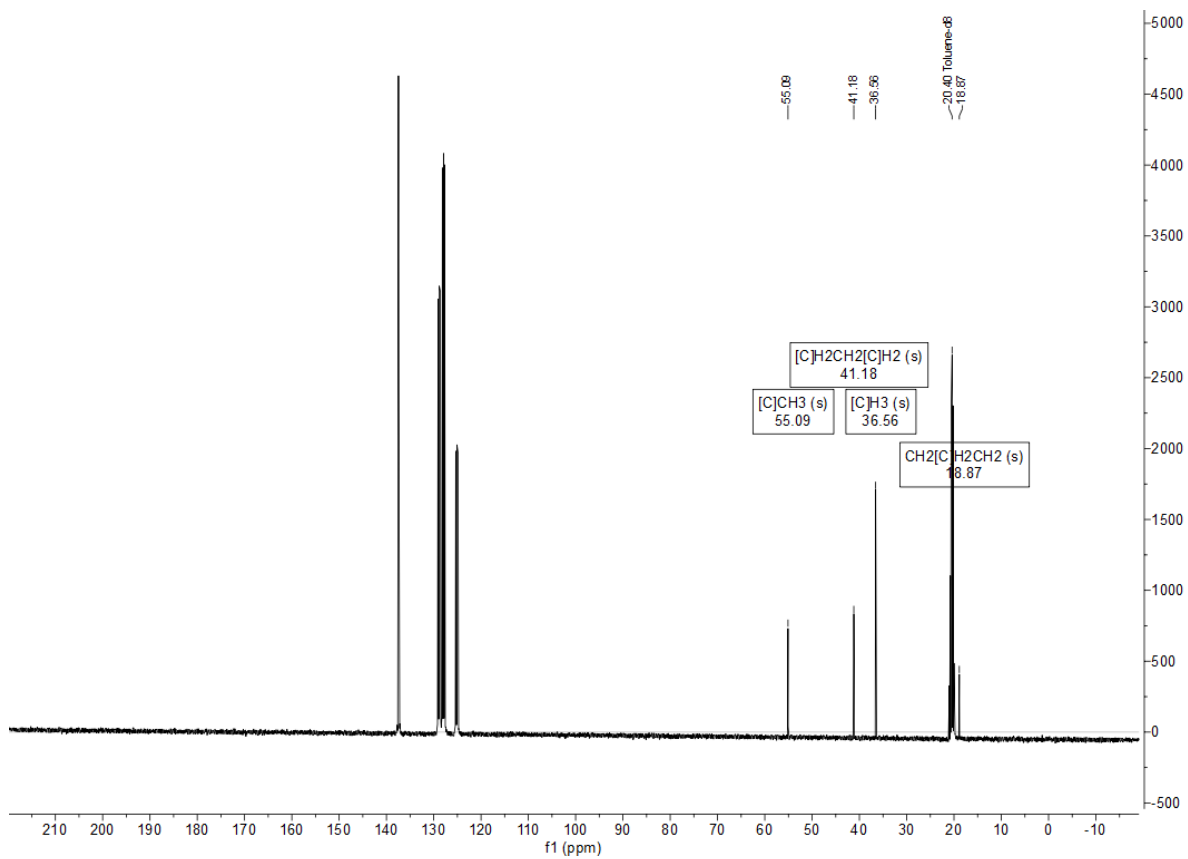

Figure S 6:  $^{13}\text{C-NMR}$  Spectrum of **2** in toluene- $d_8$ .

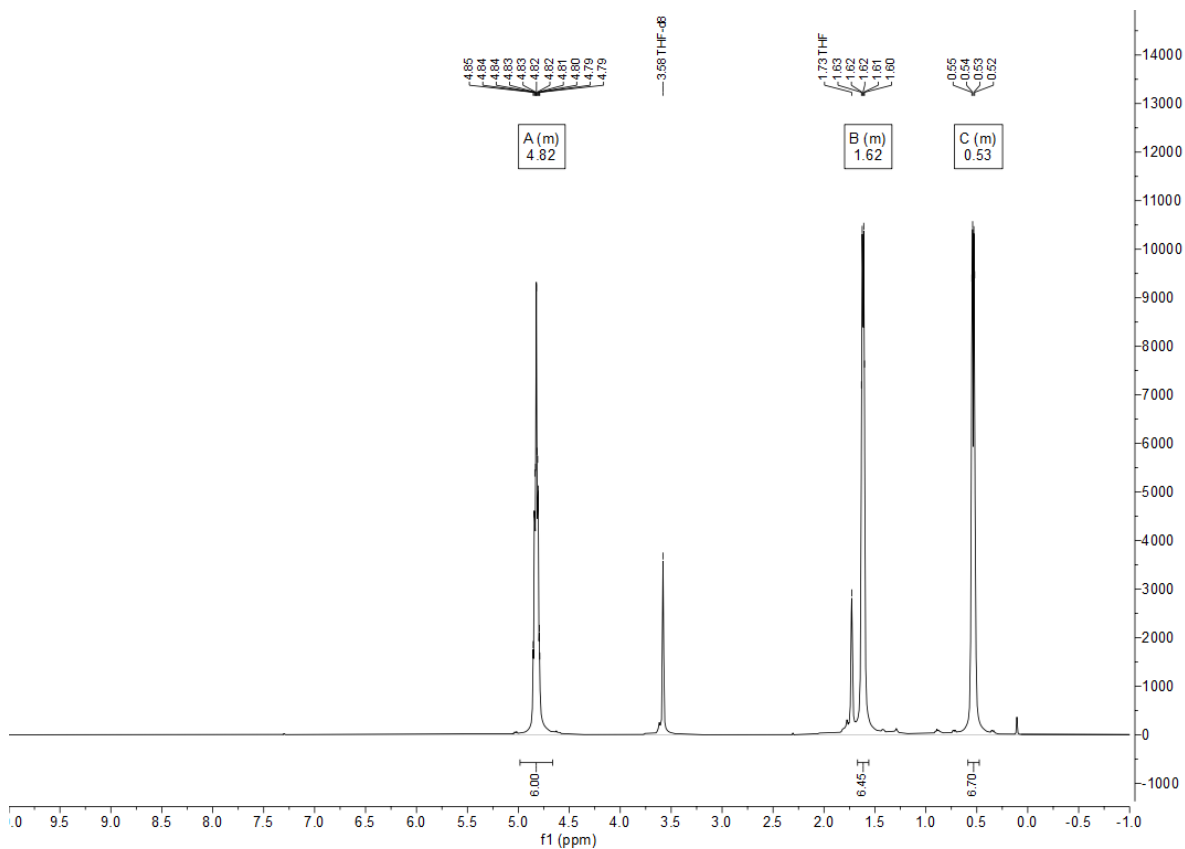

Figure S 7:  $^1\text{H-NMR}$  Spectrum of  $[\text{Mo}(\eta^4\text{-C}_4\text{H}_6)_3]$  in  $\text{thf-}d_8$ .

### IR Data

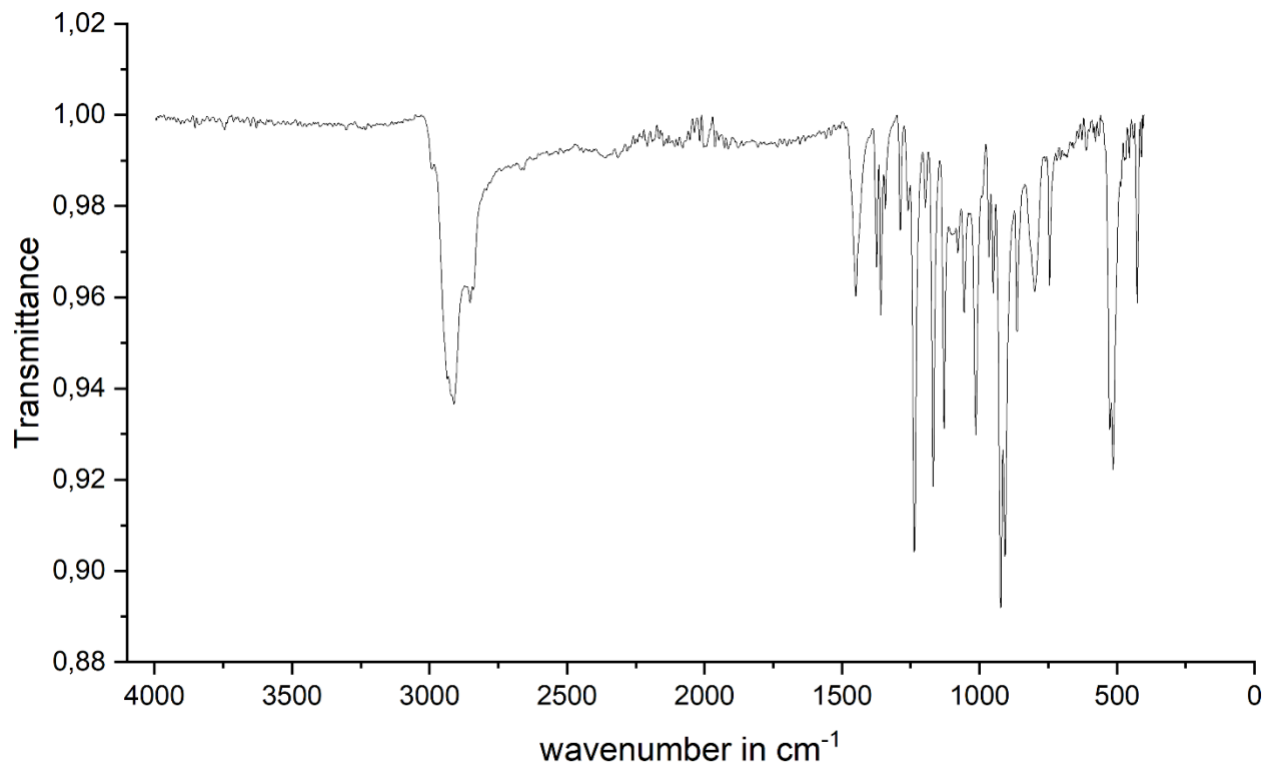

Figure S 8: IR Spectrum of 1.

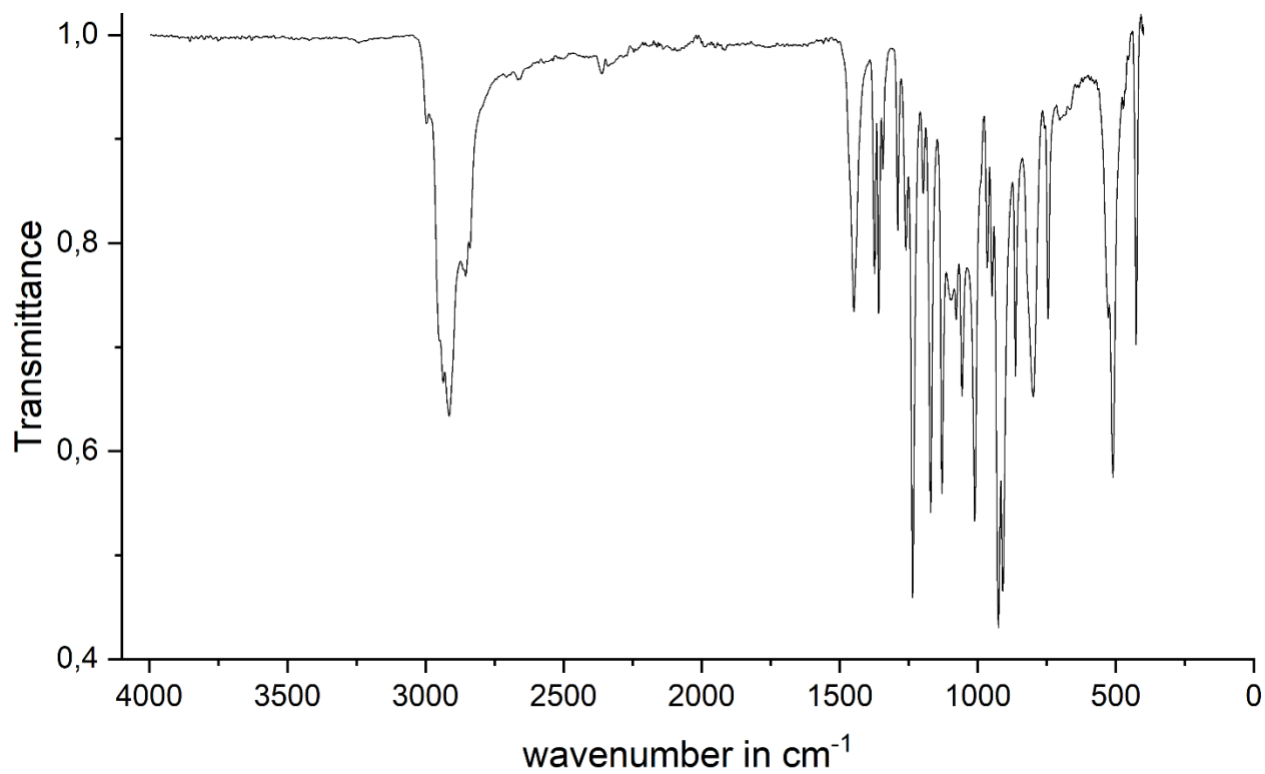

Figure S 9: IR-Spectrum of 2.

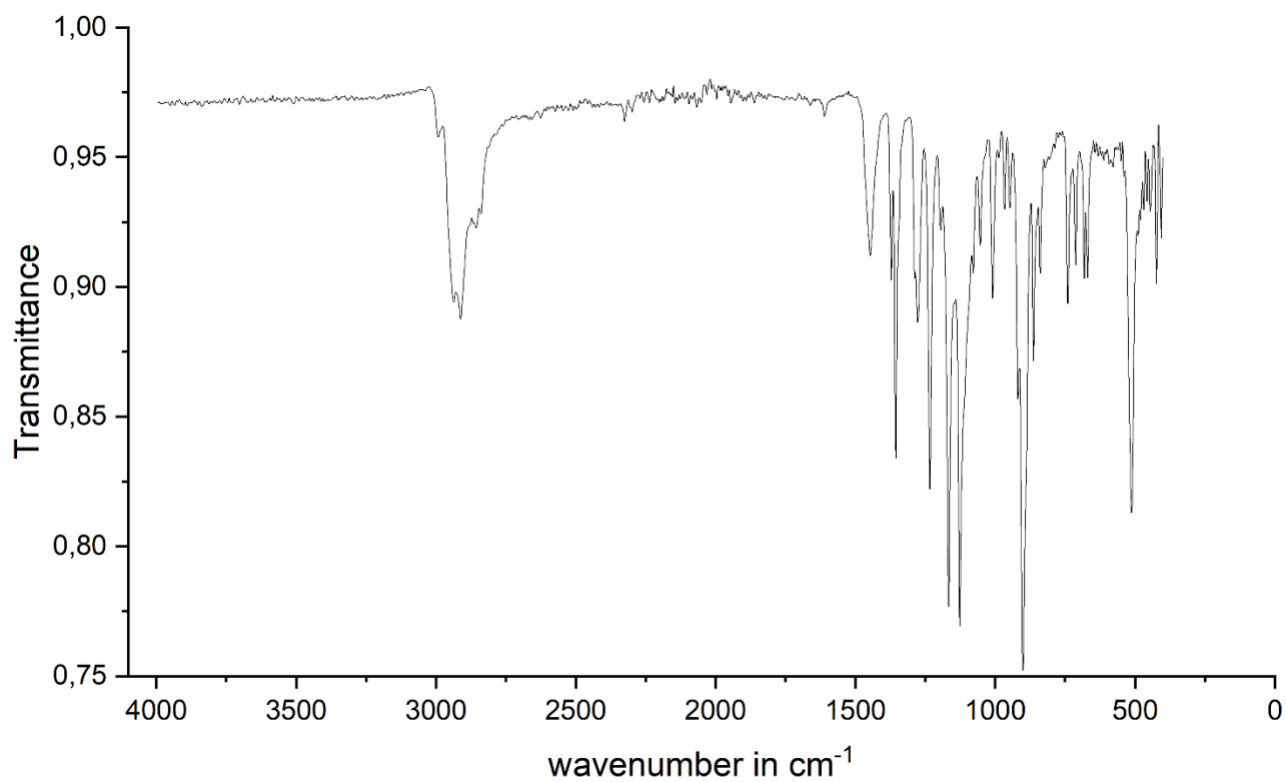

Figure S 10: IR-Spectrum of [GaTMP]<sub>4</sub>.

### LIFDI-Mass Spectra

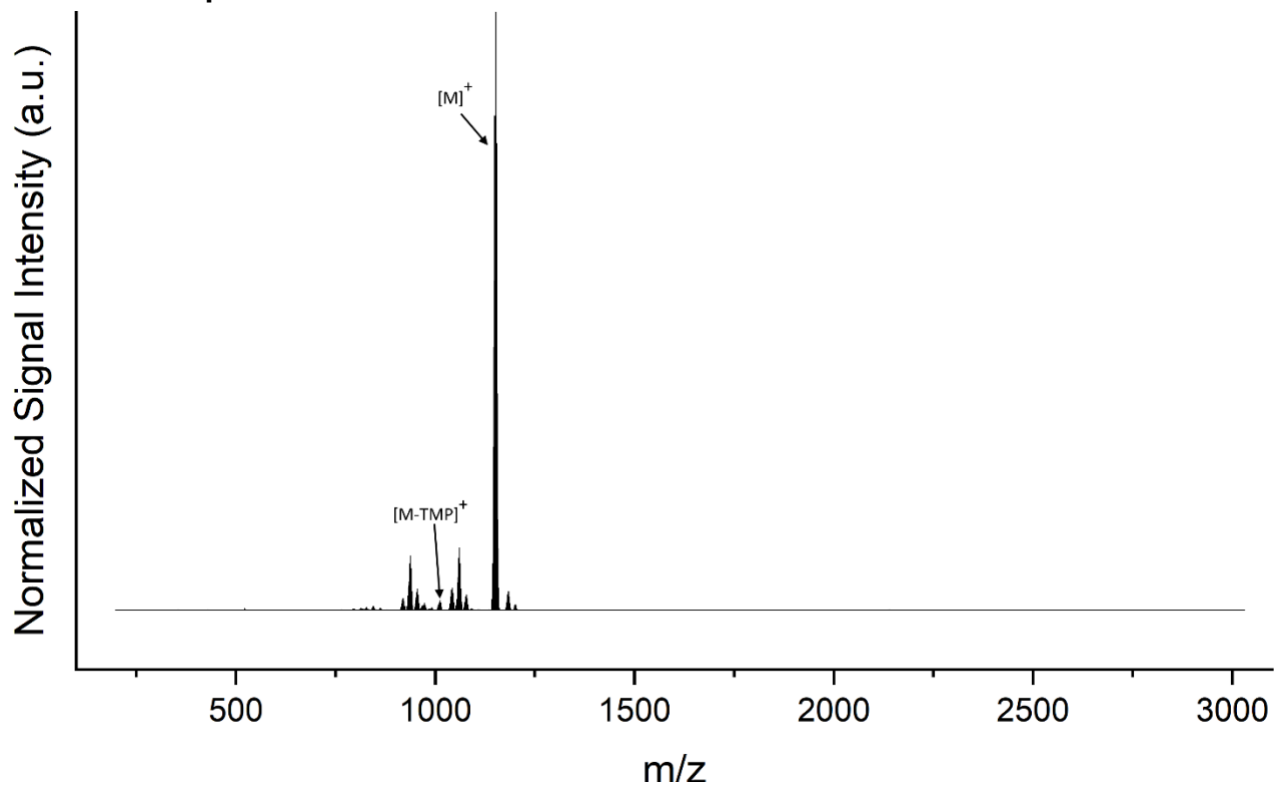

Figure S 11: Mass Spectrum of **1** from 200 – 3000 m/z.

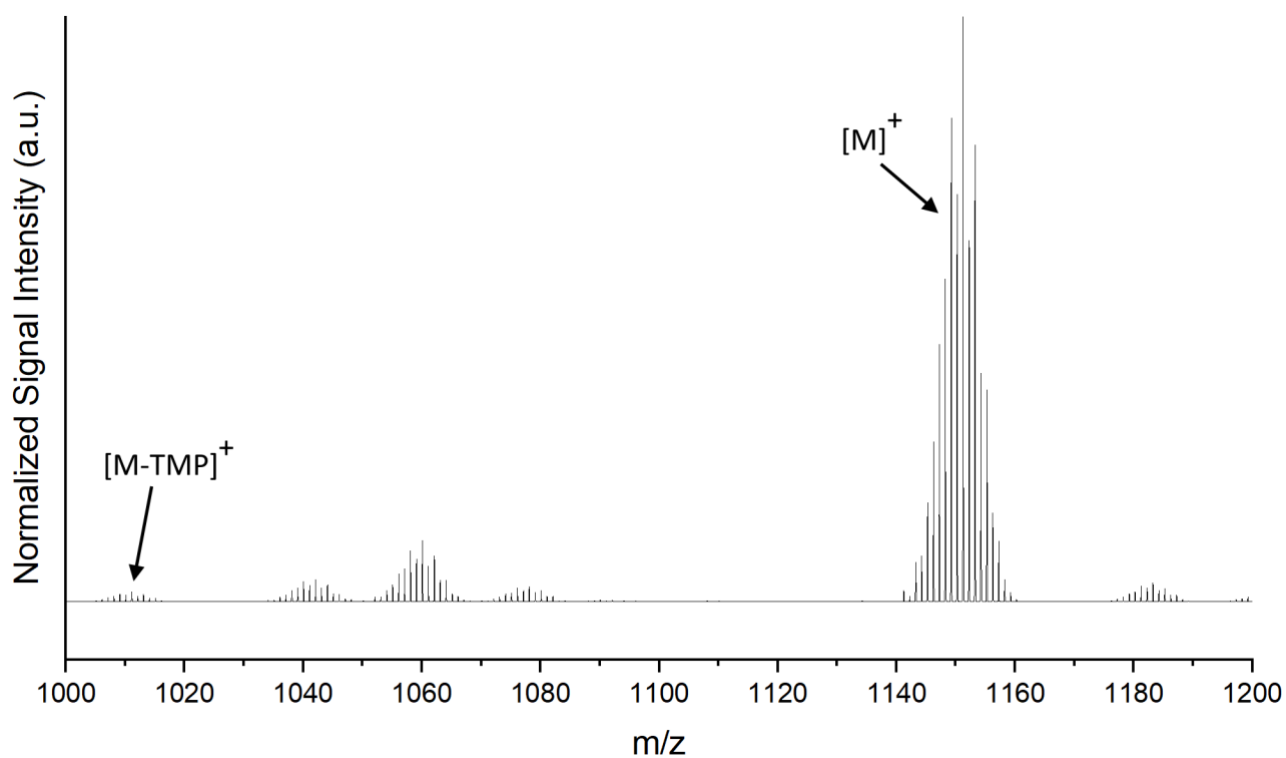

Figure S 12: Mass Spectrum of **1** from 1000 – 1200 m/z.

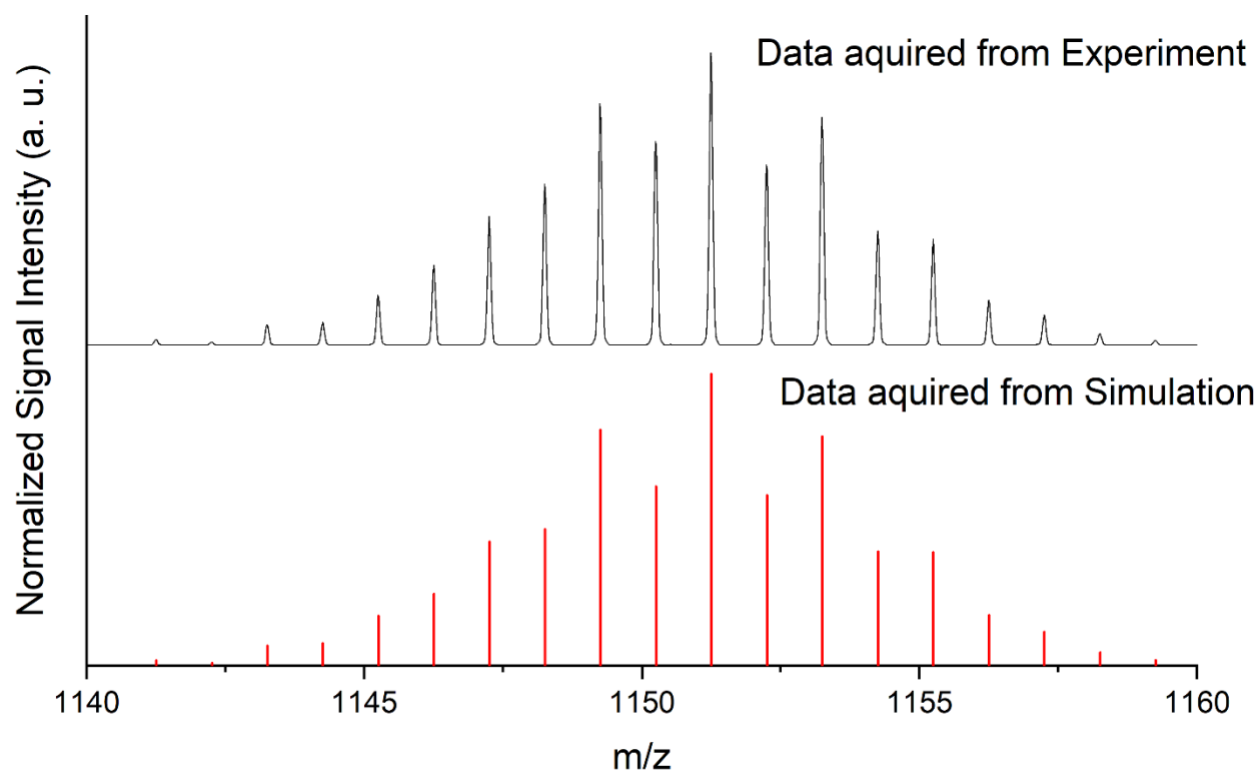

Figure S 13: Isotopic pattern of **1** and simulated isotopic pattern for  $\text{RuGa}_5\text{N}_5\text{C}_{45}\text{H}_{90}$  (red).

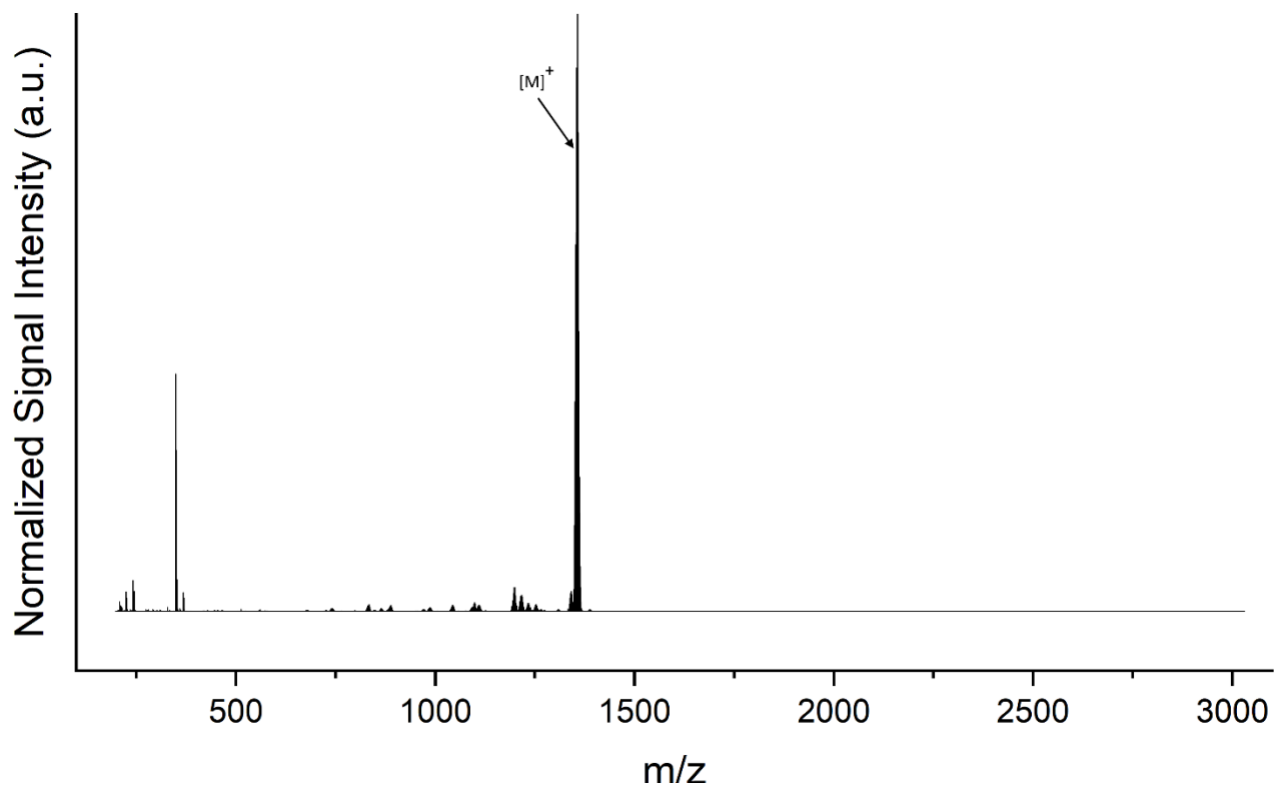

Figure S 14: Mass Spectrum of **2** from 200 – 3000  $m/z$

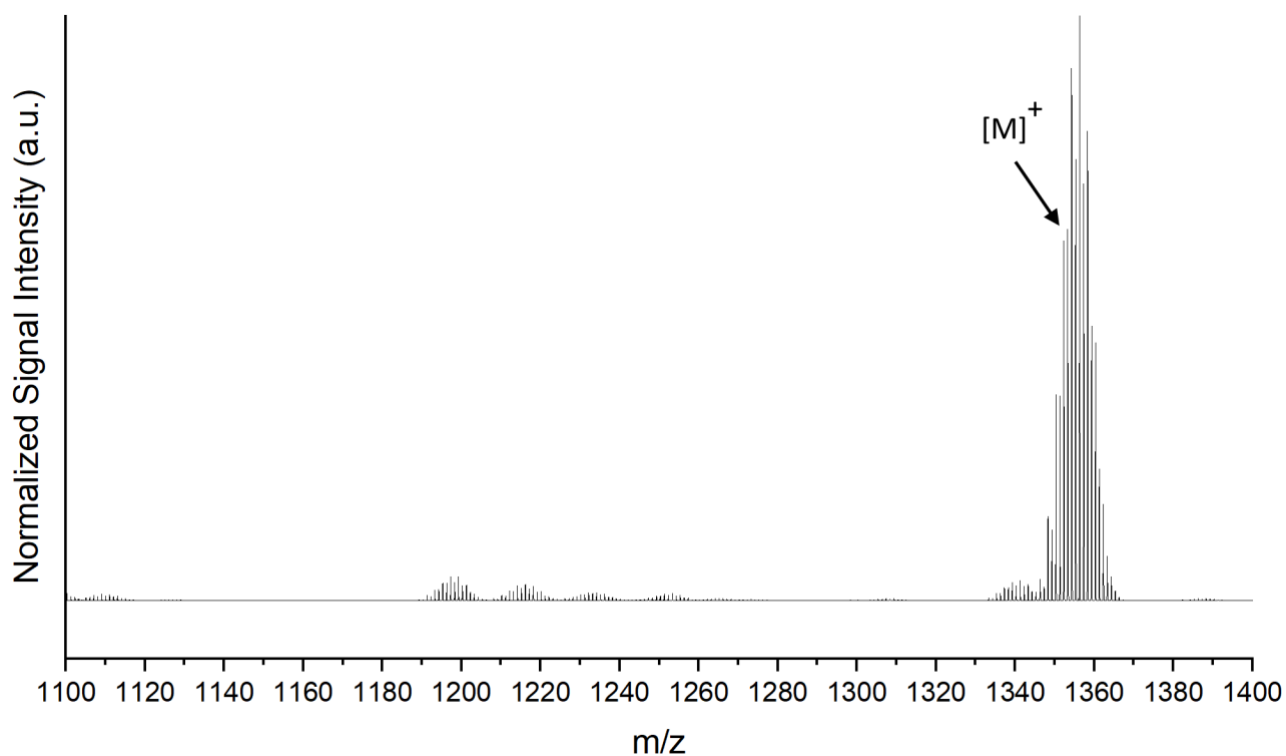

Figure S 15: Mass Spectrum of **2** from 1100 – 1400  $m/z$

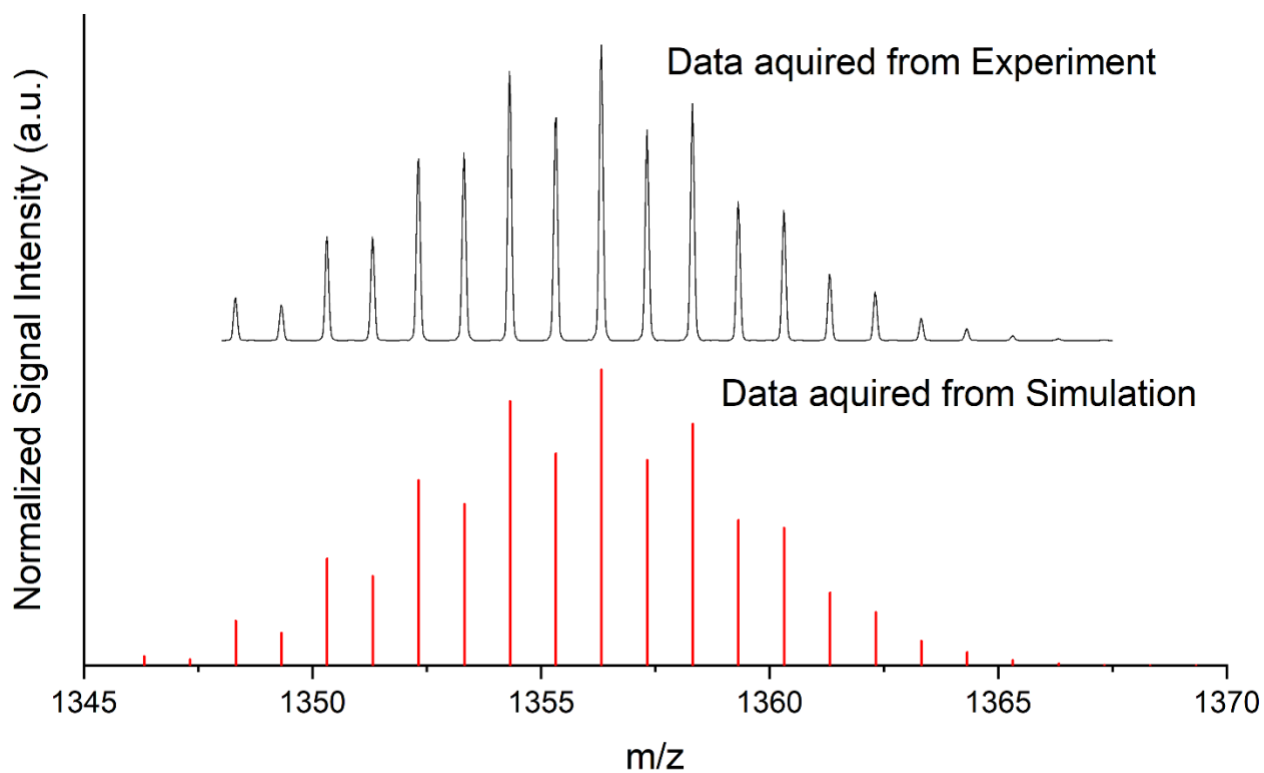

Figure S 16: Isotopic pattern of **2** and simulated isotopic pattern for  $\text{MoGa}_6\text{N}_6\text{C}_{54}\text{H}_{108}$  (red).



## Crystallography

SC-XRD structure report for compound **1**.

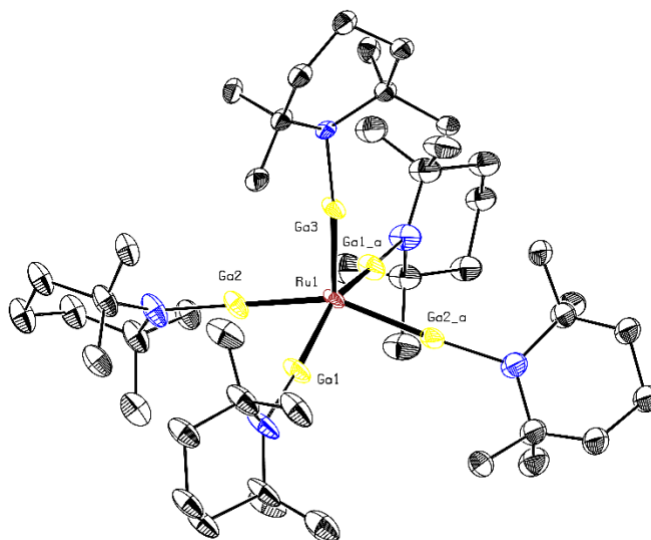

*Figure S 17:* Molecular structure of [Ru(GaTMP)<sub>5</sub>] (**1**) in the solid state determined by single crystal X-ray diffraction. Ru: orange, Ga: yellow, N: blue and C: black. Hydrogen atoms and disordered molecule fragments are omitted. Thermal ellipsoids are shown at the 50% probability level.

A yellow, block-shaped crystal of C<sub>45</sub>H<sub>90</sub>Ga<sub>5</sub>N<sub>5</sub>Ru coated with perfluorinated ether and fixed on top of a Kapton micro sampler was used for X-ray crystallographic analysis. The X-ray intensity data were collected at 100(2) K on a Bruker D8 VENTURE Duo three-angle diffractometer with an IMS microsource with MoK<sub>α</sub> radiation ( $\lambda=0.71073$  Å) using APEX4.<sup>[1C1]</sup> The diffractometer was equipped with a Helios optic monochromator, a Bruker PHOTON II detector, and a low temperature device.

A matrix scan was used to determine the initial lattice parameters. All data were integrated with the Bruker SAINT V8.40B software package using a narrow-frame algorithm and the reflections were corrected for Lorentz and polarisation effects, scan speed, and background.<sup>[2C1]</sup> The integration of the data using a monoclinic unit cell yielded a total of 5479 reflections within a 2 $\theta$  range [°] of 3.82 to 52.83 (0.80 Å), of which 5479 were independent. Data were corrected for absorption effects including odd and even ordered spherical harmonics by the multi-scan method (TWINABS 2012/1).<sup>[3C1]</sup> Space group assignment was based upon systematic absences, E statistics, and successful refinement of the structure.

The structure was solved by direct methods using SHELXT and refined by full-matrix least-squares methods against  $F^2$  by minimizing  $\Sigma w(F_o^2 - F_c^2)^2$  using SHELXL in conjunction with SHELXLE.<sup>[4C1-6C1]</sup> All non-hydrogen atoms were refined with anisotropic displacement parameters. Hydrogen atoms were refined isotropically on calculated positions using a riding model with their  $U_{iso}$  values constrained to 1.5 times the  $U_{eq}$  of their pivot atoms for terminal sp<sup>3</sup> carbon atoms and a C–H

distance of 0.98 Å. Non-methyl hydrogen atoms were refined using a riding model with methylene, aromatic, and other C–H distances of 0.99 Å, 0.95 Å, and 1.00 Å, respectively, and  $U_{\text{iso}}$  values constrained to 1.2 times the  $U_{\text{eq}}$  of their pivot atoms. Severe whole molecule and rotational disorder of the TMP moieties was modelled using the *DSR* tool plugin within SHELXL.<sup>[7C1]</sup>

Neutral atom scattering factors for all atoms and anomalous dispersion corrections for the non-hydrogen atoms were taken from International Tables for Crystallography.<sup>[8C1]</sup> Crystallographic data for the structures reported in this paper have been deposited with the Cambridge Crystallographic Data Centre.<sup>[9C1]</sup> Supplementary crystallographic data reported in this paper have been deposited with the Cambridge Crystallographic Data Centre (CCDC 2341048) and can be obtained free of charge from The Cambridge Crystallographic Data Centre via [www.ccdc.cam.ac.uk/structures](http://www.ccdc.cam.ac.uk/structures).<sup>[9C1]</sup> This report and the CIF file were generated using FinalCif.<sup>[10C1]</sup> Figures showing the coordination polyhedra around the ruthenium centre were created using VESTA 3.<sup>[11C1]</sup>

## Refinement details for compound 1.

1 was refined as a two-component twin.

Table S 2: Crystal data and structure refinement for compound 1.

|                                           |                                                                   |
|-------------------------------------------|-------------------------------------------------------------------|
| CCDC number                               | 2341048                                                           |
| Empirical formula                         | C <sub>45</sub> H <sub>90</sub> Ga <sub>5</sub> N <sub>5</sub> Ru |
| Formula weight                            | 1150.88                                                           |
| Temperature [K]                           | 100(2)                                                            |
| Crystal system                            | monoclinic                                                        |
| Space group (number)                      | $\frac{C2}{c}$ (15)                                               |
| <i>a</i> [Å]                              | 23.4724(19)                                                       |
| <i>b</i> [Å]                              | 11.9908(9)                                                        |
| <i>c</i> [Å]                              | 18.9429(14)                                                       |
| $\alpha$ [°]                              | 90                                                                |
| $\beta$ [°]                               | 93.343(3)                                                         |
| $\gamma$ [°]                              | 90                                                                |
| Volume [Å <sup>3</sup> ]                  | 5322.5(7)                                                         |
| <i>Z</i>                                  | 4                                                                 |
| $\rho_{\text{calc}}$ [gcm <sup>-3</sup> ] | 1.436                                                             |
| $\mu$ [mm <sup>-1</sup> ]                 | 2.804                                                             |
| <i>F</i> (000)                            | 2376                                                              |
| Crystal size [mm <sup>3</sup> ]           | 0.113×0.120×0.312                                                 |
| Crystal colour                            | yellow                                                            |
| Crystal shape                             | fragment                                                          |
| Radiation                                 | MoK $\alpha$ ( $\lambda=0.71073$ Å)                               |
| 2 $\theta$ range [°]                      | 3.82 to 52.83 (0.80 Å)                                            |
| Index ranges                              | -29 ≤ <i>h</i> ≤ 29<br>0 ≤ <i>k</i> ≤ 14                          |

|                                                 |                                                                  |
|-------------------------------------------------|------------------------------------------------------------------|
|                                                 | $0 \leq l \leq 23$                                               |
| Reflections collected (HKLF4)                   | 9221                                                             |
| Reflections collected (HKLF5)                   | 5479                                                             |
| Independent reflections                         | 5479<br>$R_{\text{int}} = 0.0617$<br>$R_{\text{sigma}} = 0.0456$ |
| Completeness to $\theta = 25.242^\circ$ (HKLF4) | 99.6 %                                                           |
| Data / Restraints / Parameters                  | 5479 / 1051 / 493                                                |
| Goodness-of-fit on $F^2$                        | 1.154                                                            |
| Final $R$ indexes<br>[ $\geq 2\sigma(I)$ ]      | $R_1 = 0.0562$<br>$wR_2 = 0.0928$                                |
| Final $R$ indexes<br>[all data]                 | $R_1 = 0.0745$<br>$wR_2 = 0.0989$                                |
| Largest peak/hole [ $\text{e}\text{\AA}^{-3}$ ] | 0.56/-0.85                                                       |

Table S 3: Atomic coordinates and  $U_{\text{eq}}$  [ $\text{\AA}^2$ ] for compound **1**.

| Atom | x          | y          | z          | $U_{\text{eq}}$ |
|------|------------|------------|------------|-----------------|
| Ru1  | 0.500000   | 0.62210(5) | 0.250000   | 0.02208(15)     |
| Ga1  | 0.54972(3) | 0.66491(5) | 0.35415(4) | 0.03276(17)     |
| Ga2  | 0.58257(3) | 0.67017(5) | 0.19995(4) | 0.02960(16)     |
| Ga3  | 0.500000   | 0.43247(7) | 0.250000   | 0.0291(2)       |
| N1   | 0.5932(9)  | 0.6901(17) | 0.4384(8)  | 0.041(2)        |
| C1   | 0.5972(7)  | 0.8026(13) | 0.4684(9)  | 0.041(2)        |
| C2   | 0.6580(9)  | 0.8257(16) | 0.5006(10) | 0.040(2)        |
| H2A  | 0.658150   | 0.897449   | 0.526483   | 0.048           |
| H2B  | 0.684447   | 0.832707   | 0.462032   | 0.048           |
| C3   | 0.6794(8)  | 0.7323(13) | 0.5517(10) | 0.038(2)        |
| H3A  | 0.719147   | 0.748050   | 0.569220   | 0.045           |
| H3B  | 0.655297   | 0.729391   | 0.592794   | 0.045           |
| C4   | 0.6769(10) | 0.6216(15) | 0.5133(12) | 0.039(2)        |
| H4A  | 0.688781   | 0.561740   | 0.546980   | 0.047           |
| H4B  | 0.704345   | 0.622822   | 0.475570   | 0.047           |
| C5   | 0.6179(9)  | 0.5942(15) | 0.4804(13) | 0.042(2)        |
| C6   | 0.5850(8)  | 0.8876(12) | 0.4073(9)  | 0.047(3)        |
| H6A  | 0.587460   | 0.963650   | 0.426192   | 0.070           |
| H6B  | 0.546673   | 0.874656   | 0.385587   | 0.070           |
| H6C  | 0.613242   | 0.878024   | 0.371643   | 0.070           |
| C7   | 0.5519(6)  | 0.8297(14) | 0.5222(9)  | 0.051(3)        |
| H7A  | 0.556279   | 0.907314   | 0.537795   | 0.077           |
| H7B  | 0.557187   | 0.779979   | 0.563142   | 0.077           |
| H7C  | 0.513654   | 0.818878   | 0.499738   | 0.077           |
| C8   | 0.6266(10) | 0.5004(19) | 0.4318(11) | 0.048(4)        |
| H8A  | 0.643388   | 0.437233   | 0.458478   | 0.071           |
| H8B  | 0.652374   | 0.523534   | 0.395649   | 0.071           |
| H8C  | 0.589818   | 0.478035   | 0.409011   | 0.071           |
| C9   | 0.5779(7)  | 0.5612(15) | 0.5421(9)  | 0.047(3)        |
| H9A  | 0.592847   | 0.493955   | 0.566039   | 0.071           |
| H9B  | 0.539162   | 0.546769   | 0.522041   | 0.071           |
| H9C  | 0.576997   | 0.622536   | 0.576220   | 0.071           |

|      |            |            |            |            |
|------|------------|------------|------------|------------|
| N1A  | 0.5983(12) | 0.706(2)   | 0.4301(11) | 0.040(2)   |
| C1A  | 0.6047(9)  | 0.8248(18) | 0.4473(11) | 0.041(2)   |
| C2A  | 0.6620(12) | 0.847(2)   | 0.4865(13) | 0.040(3)   |
| H2AA | 0.692444   | 0.840795   | 0.452648   | 0.048      |
| H2AB | 0.662358   | 0.923890   | 0.504984   | 0.048      |
| C3A  | 0.6753(10) | 0.7674(17) | 0.5471(13) | 0.038(3)   |
| H3AA | 0.647526   | 0.777662   | 0.583928   | 0.046      |
| H3AB | 0.714029   | 0.782508   | 0.568585   | 0.046      |
| C4A  | 0.6720(13) | 0.648(2)   | 0.5188(16) | 0.039(3)   |
| H4AA | 0.681585   | 0.595472   | 0.558038   | 0.047      |
| H4AB | 0.700717   | 0.638341   | 0.482984   | 0.047      |
| C5A  | 0.6110(12) | 0.619(2)   | 0.4844(17) | 0.042(2)   |
| C6A  | 0.6022(9)  | 0.8935(17) | 0.3796(11) | 0.041(4)   |
| H6AA | 0.614037   | 0.970279   | 0.390516   | 0.062      |
| H6AB | 0.563118   | 0.893498   | 0.358416   | 0.062      |
| H6AC | 0.627930   | 0.860971   | 0.346195   | 0.062      |
| C7A  | 0.5581(9)  | 0.8675(19) | 0.4945(12) | 0.053(4)   |
| H7AA | 0.559700   | 0.949103   | 0.497036   | 0.079      |
| H7AB | 0.564387   | 0.836327   | 0.542181   | 0.079      |
| H7AC | 0.520534   | 0.844317   | 0.474445   | 0.079      |
| C8A  | 0.6113(12) | 0.502(2)   | 0.4464(15) | 0.044(4)   |
| H8AA | 0.628414   | 0.445931   | 0.478954   | 0.066      |
| H8AB | 0.633723   | 0.506809   | 0.404444   | 0.066      |
| H8AC | 0.572102   | 0.479980   | 0.432218   | 0.066      |
| C9A  | 0.5672(10) | 0.605(2)   | 0.5387(13) | 0.051(4)   |
| H9AA | 0.579426   | 0.545748   | 0.571978   | 0.077      |
| H9AB | 0.530420   | 0.584703   | 0.515012   | 0.077      |
| H9AC | 0.563269   | 0.675034   | 0.564466   | 0.077      |
| N2   | 0.6524(2)  | 0.7043(4)  | 0.1650(3)  | 0.0368(11) |
| C10  | 0.6515(9)  | 0.819(2)   | 0.1320(12) | 0.039(2)   |
| C11  | 0.7010(8)  | 0.822(2)   | 0.0799(11) | 0.041(2)   |
| H11A | 0.690824   | 0.772220   | 0.039188   | 0.049      |
| H11B | 0.705054   | 0.898292   | 0.061478   | 0.049      |
| C12  | 0.7575(8)  | 0.7846(19) | 0.1140(11) | 0.041(3)   |
| H12A | 0.769394   | 0.835346   | 0.153365   | 0.049      |
| H12B | 0.787205   | 0.785707   | 0.079012   | 0.049      |
| C13  | 0.7497(9)  | 0.6647(19) | 0.1422(12) | 0.038(2)   |
| H13A | 0.738295   | 0.614730   | 0.102204   | 0.046      |
| H13B | 0.786530   | 0.637535   | 0.163816   | 0.046      |
| C14  | 0.7055(14) | 0.660(2)   | 0.1958(17) | 0.035(2)   |
| C15  | 0.5967(9)  | 0.840(2)   | 0.0897(12) | 0.039(4)   |
| H15A | 0.566325   | 0.854872   | 0.121778   | 0.059      |
| H15B | 0.586802   | 0.773750   | 0.061138   | 0.059      |
| H15C | 0.601091   | 0.904138   | 0.058599   | 0.059      |
| C16  | 0.6573(11) | 0.917(2)   | 0.1829(14) | 0.043(4)   |
| H16A | 0.652021   | 0.986753   | 0.156741   | 0.065      |
| H16B | 0.695416   | 0.915590   | 0.207063   | 0.065      |
| H16C | 0.628359   | 0.910564   | 0.217918   | 0.065      |
| C17  | 0.6923(14) | 0.537(3)   | 0.211(2)   | 0.033(4)   |
| H17A | 0.724477   | 0.504077   | 0.238777   | 0.049      |
| H17B | 0.686007   | 0.496921   | 0.166340   | 0.049      |
| H17C | 0.657858   | 0.532817   | 0.237848   | 0.049      |

|      |            |            |            |            |
|------|------------|------------|------------|------------|
| C18  | 0.7298(13) | 0.715(2)   | 0.2626(13) | 0.035(4)   |
| H18A | 0.759930   | 0.667459   | 0.284472   | 0.053      |
| H18B | 0.699438   | 0.724452   | 0.295472   | 0.053      |
| H18C | 0.745692   | 0.787679   | 0.251256   | 0.053      |
| N2A  | 0.6524(2)  | 0.7043(4)  | 0.1650(3)  | 0.0368(11) |
| C10A | 0.6627(8)  | 0.8017(16) | 0.1190(10) | 0.037(2)   |
| C11A | 0.7135(7)  | 0.7851(17) | 0.0738(9)  | 0.040(2)   |
| H11C | 0.703185   | 0.730181   | 0.036226   | 0.048      |
| H11D | 0.722167   | 0.856634   | 0.050614   | 0.048      |
| C12A | 0.7663(7)  | 0.7451(18) | 0.1155(10) | 0.042(2)   |
| H12C | 0.778136   | 0.801217   | 0.151791   | 0.050      |
| H12D | 0.797864   | 0.735985   | 0.083473   | 0.050      |
| C13A | 0.7546(8)  | 0.6351(17) | 0.1508(10) | 0.038(2)   |
| H13C | 0.789297   | 0.611213   | 0.178975   | 0.046      |
| H13D | 0.746098   | 0.577999   | 0.113925   | 0.046      |
| C14A | 0.7029(12) | 0.642(2)   | 0.2008(15) | 0.035(2)   |
| C15A | 0.6075(7)  | 0.8121(16) | 0.0697(10) | 0.034(3)   |
| H15D | 0.611861   | 0.873574   | 0.036323   | 0.050      |
| H15E | 0.574862   | 0.826961   | 0.098240   | 0.050      |
| H15F | 0.601131   | 0.742361   | 0.043450   | 0.050      |
| C16A | 0.6699(10) | 0.9092(19) | 0.1643(11) | 0.044(4)   |
| H16D | 0.668057   | 0.974615   | 0.133188   | 0.066      |
| H16E | 0.706996   | 0.907597   | 0.190933   | 0.066      |
| H16F | 0.639368   | 0.913355   | 0.197251   | 0.066      |
| C17A | 0.6845(13) | 0.523(2)   | 0.2160(18) | 0.036(4)   |
| H17D | 0.718084   | 0.478067   | 0.230889   | 0.054      |
| H17E | 0.665952   | 0.490178   | 0.173086   | 0.054      |
| H17F | 0.657678   | 0.523166   | 0.253707   | 0.054      |
| C18A | 0.7211(11) | 0.694(2)   | 0.2740(11) | 0.038(4)   |
| H18D | 0.753080   | 0.651506   | 0.296018   | 0.056      |
| H18E | 0.688822   | 0.691660   | 0.304519   | 0.056      |
| H18F | 0.732788   | 0.771492   | 0.267376   | 0.056      |
| N3   | 0.4948(6)  | 0.2783(6)  | 0.2606(6)  | 0.0199(17) |
| C19  | 0.552(3)   | 0.222(4)   | 0.277(3)   | 0.0236(18) |
| C20  | 0.5625(5)  | 0.1045(9)  | 0.2457(6)  | 0.0275(18) |
| H20A | 0.577562   | 0.112768   | 0.198186   | 0.033      |
| H20B | 0.591748   | 0.065380   | 0.276252   | 0.033      |
| C21  | 0.5094(6)  | 0.0360(8)  | 0.2399(7)  | 0.0296(19) |
| H21A | 0.496829   | 0.019344   | 0.287794   | 0.036      |
| H21B | 0.517101   | -0.035641  | 0.216300   | 0.036      |
| C22  | 0.4620(5)  | 0.0988(9)  | 0.1974(6)  | 0.0271(18) |
| H22A | 0.472904   | 0.105249   | 0.147835   | 0.033      |
| H22B | 0.426635   | 0.053724   | 0.197066   | 0.033      |
| C23  | 0.449(3)   | 0.215(4)   | 0.225(3)   | 0.0233(18) |
| C24  | 0.6073(5)  | 0.2904(9)  | 0.2642(7)  | 0.030(2)   |
| H24A | 0.640895   | 0.246930   | 0.280671   | 0.045      |
| H24B | 0.606635   | 0.360761   | 0.290410   | 0.045      |
| H24C | 0.609144   | 0.306023   | 0.213605   | 0.045      |
| C25  | 0.5491(5)  | 0.2139(9)  | 0.3582(6)  | 0.028(2)   |
| H25A | 0.587368   | 0.199039   | 0.379577   | 0.042      |
| H25B | 0.523386   | 0.153058   | 0.369864   | 0.042      |
| H25C | 0.534832   | 0.284307   | 0.376554   | 0.042      |

|      |           |           |           |          |
|------|-----------|-----------|-----------|----------|
| C26  | 0.4176(5) | 0.2794(9) | 0.1664(6) | 0.027(2) |
| H26A | 0.382069  | 0.240506  | 0.151958  | 0.041    |
| H26B | 0.441553  | 0.285107  | 0.125830  | 0.041    |
| H26C | 0.408741  | 0.354294  | 0.183223  | 0.041    |
| C27  | 0.4136(5) | 0.2104(9) | 0.2887(6) | 0.026(2) |
| H27A | 0.377318  | 0.172859  | 0.276234  | 0.039    |
| H27B | 0.406147  | 0.286245  | 0.305040  | 0.039    |
| H27C | 0.434520  | 0.168760  | 0.326450  | 0.039    |

$U_{eq}$  is defined as 1/3 of the trace of the orthogonalized  $U_j$  tensor

## References

- [1C1] APEX4 Suite of Crystallographic Software, Version 2021-10.0, Bruker AXS Inc., Madison, Wisconsin, USA, **2021**.  
 [2C1] Bruker, SAINT, V8.40B, Bruker AXS Inc., Madison, Wisconsin, USA.  
 [3C1] L. Krause, R. Herbst-Irmer, G. M. Sheldrick, D. Stalke, *J. Appl. Cryst.* **2015**, *48*, 3–10, doi:10.1107/S1600576714022985.  
 [4C1] G. M. Sheldrick, *Acta Cryst.* **2015**, *A71*, 3–8, doi:10.1107/S2053273314026370.  
 [5C1] G. M. Sheldrick, *Acta Cryst.* **2015**, *C71*, 3–8, doi:10.1107/S2053229614024218.  
 [6C1] C. B. Huebschle, G. M. Sheldrick, B. Dittrich, *J. Appl. Cryst.* **2011**, *44*, 1281–1284, doi:10.1107/S0021889811043202.  
 [7C1] D. Kratzert, J. J. Holstein, I. Krossing, *J. Appl. Cryst.*, 2015, **48**, 933–938.  
 [8C1] Ed. E. Prince, *International Tables for Crystallography Volume C, Mathematical, Physical and Chemical Tables*, International Union of Crystallography, Chester, England, **2006**, 500–502; 219–222; 193–199.  
 [9C1] C. R. Groom, I. J. Bruno, M. P. Lightfoot, S. C. Ward, *Acta Cryst.* **2016**, *B72*, 171–179, doi:10.1107/S2052520616003954.  
 [10C1] D. Kratzert, *FinalCif*, V106, <https://dkratzert.de/finalcif.html>.  
 [11C1] K. Momma, F. Izumi, *J. Appl. Crystallogr.* **2011**, *44*, 1272–1276.

## SC-XRD structure report for compound **2**.

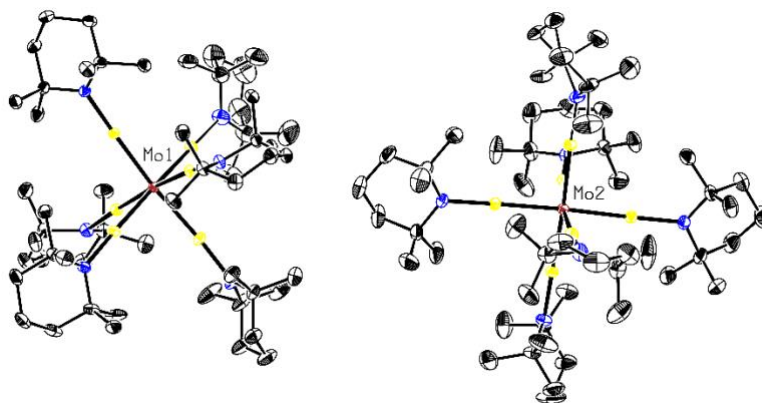

Figure S 18: Molecular structure of  $[\text{Mo}(\text{GaTMP})_6]$  (**2**) in the solid state determined by single crystal X-ray diffraction. Mo: red, Ga: yellow, N: blue and C: black. Hydrogen atoms and disordered molecule fragments are omitted. Thermal ellipsoids are shown at the 50% probability level.

A colourless, block-shaped crystal of  $\text{C}_{54}\text{H}_{108}\text{Ga}_6\text{MoN}_6$  coated with perfluorinated ether and fixed on top of a Kapton micro sampler was used for X-ray crystallographic analysis. The X-ray intensity data were collected at 100(2) K on a Bruker D8 VENTURE Duo three-angle diffractometer with an IMS microsource with  $\text{MoK}_\alpha$  radiation ( $\lambda=0.71073 \text{ \AA}$ ) using APEX4.<sup>[1C2]</sup> The diffractometer was

equipped with a Helios optic monochromator, a Bruker PHOTON II detector, and a low temperature device.

A matrix scan was used to determine the initial lattice parameters. All data were integrated with the Bruker SAINT V8.40B software package using a narrow-frame algorithm and the reflections were corrected for Lorentz and polarisation effects, scan speed, and background.<sup>[2C2]</sup> The integration of the data using a monoclinic unit cell yielded a total of 776202 reflections within a  $2\theta$  range [°] of 4.08 to 52.83 (0.80 Å), of which 26306 were independent. Data were corrected for absorption effects including odd and even ordered spherical harmonics by the multi-scan method (SADABS 2016/2).<sup>[3C2]</sup> Space group assignment was based upon systematic absences, E statistics, and successful refinement of the structure.

The structure was solved by direct methods using SHELXT and refined by full-matrix least-squares methods against  $F^2$  by minimizing  $\sum w(F_o^2 - F_c^2)^2$  using SHELXL in conjunction with SHELXLE.<sup>[4C2-6C2]</sup> All non-hydrogen atoms were refined with anisotropic displacement parameters. Hydrogen atoms were refined isotropically on calculated positions using a riding model with their  $U_{iso}$  values constrained to 1.5 times the  $U_{eq}$  of their pivot atoms for terminal  $sp^3$  carbon atoms and a C–H distance of 0.98 Å. Non-methyl hydrogen atoms were refined using a riding model with methylene, aromatic, and other C–H distances of 0.99 Å, 0.95 Å, and 1.00 Å, respectively, and  $U_{iso}$  values constrained to 1.2 times the  $U_{eq}$  of their pivot atoms. Whole molecule disorder and rotational disorder, e.g. of TMP moieties, was modelled using the *DSR* tool plugin within SHELXLE.<sup>[7C2]</sup>

Neutral atom scattering factors for all atoms and anomalous dispersion corrections for the non-hydrogen atoms were taken from International Tables for Crystallography.<sup>[8C2]</sup> Crystallographic data for the structures reported in this paper have been deposited with the Cambridge Crystallographic Data Centre.<sup>[9C2]</sup> Supplementary crystallographic data reported in this paper have been deposited with the Cambridge Crystallographic Data Centre (CCDC 2341049) and can be obtained free of charge from The Cambridge Crystallographic Data Centre via [www.ccdc.cam.ac.uk/structures](http://www.ccdc.cam.ac.uk/structures).<sup>[9C2]</sup> This report and the CIF file were generated using FinalCif.<sup>[10C2]</sup> Figures showing the coordination polyhedra around the molybdenum centre were created using VESTA 3.<sup>[11C2]</sup>

Table S 4: Crystal data and structure refinement for compound 2.

|                      |                                                                   |
|----------------------|-------------------------------------------------------------------|
| CCDC number          | 2341049                                                           |
| Empirical formula    | C <sub>54</sub> H <sub>108</sub> Ga <sub>6</sub> MoN <sub>6</sub> |
| Formula weight       | 1355.72                                                           |
| Temperature [K]      | 100(2)                                                            |
| Crystal system       | monoclinic                                                        |
| Space group (number) | $\frac{P2_1}{c}$ (14)                                             |
| <i>a</i> [Å]         | 26.9295(18)                                                       |
| <i>b</i> [Å]         | 21.9030(15)                                                       |

|                                           |                                                                   |
|-------------------------------------------|-------------------------------------------------------------------|
| c [Å]                                     | 24.2260(15)                                                       |
| $\alpha$ [°]                              | 90                                                                |
| $\beta$ [°]                               | 116.221(2)                                                        |
| $\gamma$ [°]                              | 90                                                                |
| Volume [Å <sup>3</sup> ]                  | 12819.0(15)                                                       |
| Z                                         | 8                                                                 |
| $\rho_{\text{calc}}$ [gcm <sup>-3</sup> ] | 1.405                                                             |
| $\mu$ [mm <sup>-1</sup> ]                 | 2.709                                                             |
| F(000)                                    | 5616                                                              |
| Crystal size [mm <sup>3</sup> ]           | 0.278×0.339×0.428                                                 |
| Crystal colour                            | colourless                                                        |
| Crystal shape                             | block                                                             |
| Radiation                                 | MoK $\alpha$ ( $\lambda=0.71073$ Å)                               |
| 2 $\theta$ range [°]                      | 4.08 to 52.83 (0.80 Å)                                            |
| Index ranges                              | -33 ≤ h ≤ 33<br>-27 ≤ k ≤ 27<br>-30 ≤ l ≤ 30                      |
| Reflections collected                     | 776202                                                            |
| Independent reflections                   | 26306<br>$R_{\text{int}} = 0.0429$<br>$R_{\text{sigma}} = 0.0122$ |
| Completeness to $\theta = 25.242^\circ$   | 99.9 %                                                            |
| Data / Restraints / Parameters            | 26306 / 739 / 1436                                                |
| Goodness-of-fit on $F^2$                  | 1.028                                                             |
| Final R indexes [≥2 $\sigma(I)$ ]         | $R_1 = 0.0198$<br>$wR_2 = 0.0441$                                 |
| Final R indexes [all data]                | $R_1 = 0.0255$<br>$wR_2 = 0.0466$                                 |
| Largest peak/hole [eÅ <sup>-3</sup> ]     | 0.55/-0.46                                                        |

Table S 5: Atomic coordinates and  $U_{\text{eq}}$  [Å<sup>2</sup>] for compound **2**.

| Atom | x          | y          | z          | $U_{\text{eq}}$ |
|------|------------|------------|------------|-----------------|
| Mo1  | 0.38238(2) | 0.74227(2) | 0.23060(2) | 0.01366(3)      |
| Mo2  | 0.11461(2) | 0.23662(2) | 0.34993(2) | 0.01461(3)      |
| Ga1  | 0.32971(2) | 0.72828(2) | 0.28718(2) | 0.01931(4)      |
| Ga2  | 0.32465(2) | 0.67490(2) | 0.15029(2) | 0.02012(4)      |
| Ga3  | 0.45061(2) | 0.74184(2) | 0.19234(2) | 0.01487(4)      |
| Ga4  | 0.43058(2) | 0.81839(2) | 0.30507(2) | 0.01559(4)      |
| Ga5  | 0.32948(2) | 0.82742(2) | 0.17237(2) | 0.01659(4)      |
| Ga6  | 0.43626(2) | 0.66305(2) | 0.29688(2) | 0.01627(4)      |
| Ga7  | 0.17039(2) | 0.31657(2) | 0.33955(2) | 0.01780(4)      |
| Ga8  | 0.05019(2) | 0.23283(2) | 0.24396(2) | 0.01641(4)      |
| Ga9  | 0.06052(2) | 0.15865(2) | 0.36589(2) | 0.01725(4)      |
| Ga10 | 0.17637(2) | 0.22566(2) | 0.45628(2) | 0.02001(4)      |
| Ga11 | 0.16747(2) | 0.16462(2) | 0.32425(2) | 0.01861(4)      |
| Ga12 | 0.06146(2) | 0.31313(2) | 0.36953(2) | 0.01758(4)      |
| N1   | 0.29434(6) | 0.72121(8) | 0.33751(7) | 0.0263(3)       |
| N3   | 0.50659(6) | 0.73802(6) | 0.16701(7) | 0.0174(3)       |



|      |             |             |             |            |
|------|-------------|-------------|-------------|------------|
| N4   | 0.46444(6)  | 0.87955(7)  | 0.36181(7)  | 0.0194(3)  |
| N5   | 0.28979(6)  | 0.89690(7)  | 0.13216(7)  | 0.0201(3)  |
| N6   | 0.47526(6)  | 0.60219(6)  | 0.35206(7)  | 0.0192(3)  |
| N7   | 0.21475(6)  | 0.37883(7)  | 0.33388(7)  | 0.0249(3)  |
| N8   | 0.00095(6)  | 0.22435(7)  | 0.16147(7)  | 0.0215(3)  |
| N9   | 0.01804(6)  | 0.09709(7)  | 0.37621(7)  | 0.0237(3)  |
| N10  | 0.22489(7)  | 0.21346(8)  | 0.53826(7)  | 0.0297(4)  |
| N12  | 0.01959(6)  | 0.37220(7)  | 0.38440(7)  | 0.0237(3)  |
| C1   | 0.23537(9)  | 0.73903(12) | 0.31267(10) | 0.0377(5)  |
| C2   | 0.22532(10) | 0.77367(12) | 0.36204(11) | 0.0444(6)  |
| H2A  | 0.243627    | 0.814038    | 0.368915    | 0.053      |
| H2B  | 0.185091    | 0.780681    | 0.346790    | 0.053      |
| C3   | 0.24697(10) | 0.73964(12) | 0.42285(11) | 0.0421(6)  |
| H3A  | 0.226736    | 0.700635    | 0.417299    | 0.051      |
| H3B  | 0.241021    | 0.764449    | 0.453562    | 0.051      |
| C4   | 0.30852(9)  | 0.72711(10) | 0.44553(9)  | 0.0339(5)  |
| H4A  | 0.322256    | 0.703565    | 0.484364    | 0.041      |
| H4B  | 0.328707    | 0.766428    | 0.454504    | 0.041      |
| C5   | 0.32101(8)  | 0.69143(9)  | 0.39859(8)  | 0.0256(4)  |
| C6   | 0.22264(10) | 0.78276(14) | 0.25888(11) | 0.0521(7)  |
| H6A  | 0.184035    | 0.796219    | 0.242405    | 0.078      |
| H6B  | 0.228561    | 0.761795    | 0.226543    | 0.078      |
| H6C  | 0.247180    | 0.818304    | 0.273221    | 0.078      |
| C7   | 0.19534(9)  | 0.68477(14) | 0.28765(12) | 0.0545(7)  |
| H7A  | 0.157326    | 0.699981    | 0.265770    | 0.082      |
| H7B  | 0.198428    | 0.658743    | 0.321925    | 0.082      |
| H7C  | 0.204756    | 0.661015    | 0.259309    | 0.082      |
| C8   | 0.38354(8)  | 0.69198(10) | 0.42046(9)  | 0.0307(4)  |
| H8A  | 0.402001    | 0.675794    | 0.462440    | 0.046      |
| H8B  | 0.395957    | 0.733939    | 0.419926    | 0.046      |
| H8C  | 0.392833    | 0.666552    | 0.393050    | 0.046      |
| C9   | 0.30443(10) | 0.62397(10) | 0.39771(11) | 0.0401(5)  |
| H9A  | 0.328994    | 0.604630    | 0.436808    | 0.060      |
| H9B  | 0.307645    | 0.602779    | 0.363811    | 0.060      |
| H9C  | 0.266099    | 0.621596    | 0.391963    | 0.060      |
| N2   | 0.27960(7)  | 0.62157(8)  | 0.08901(8)  | 0.0349(4)  |
| C10  | 0.3029(11)  | 0.5847(11)  | 0.0551(11)  | 0.0364(10) |
| C11  | 0.2653(2)   | 0.5913(3)   | -0.0148(2)  | 0.0575(11) |
| H11A | 0.266396    | 0.634142    | -0.027383   | 0.069      |
| H11B | 0.279534    | 0.564952    | -0.037783   | 0.069      |
| C12  | 0.20507(18) | 0.5736(3)   | -0.0316(2)  | 0.0659(12) |
| H12A | 0.181951    | 0.576998    | -0.076578   | 0.079      |
| H12B | 0.203153    | 0.531120    | -0.018832   | 0.079      |
| C13  | 0.18584(19) | 0.6161(2)   | 0.0011(3)   | 0.0626(12) |
| H13A | 0.146786    | 0.606624    | -0.009114   | 0.075      |
| H13B | 0.187099    | 0.658064    | -0.013345   | 0.075      |
| C14  | 0.2206(2)   | 0.6138(3)   | 0.0722(3)   | 0.0454(10) |
| C15  | 0.3611(2)   | 0.6059(3)   | 0.0684(3)   | 0.0413(12) |
| H15A | 0.375016    | 0.581172    | 0.044519    | 0.062      |
| H15B | 0.385568    | 0.601152    | 0.112365    | 0.062      |
| H15C | 0.359954    | 0.648909    | 0.056808    | 0.062      |
| C16  | 0.3103(3)   | 0.5173(3)   | 0.0706(3)   | 0.0547(13) |

|      |            |            |            |            |
|------|------------|------------|------------|------------|
| H16A | 0.334648   | 0.499190   | 0.054657   | 0.082      |
| H16B | 0.274211   | 0.496940   | 0.051942   | 0.082      |
| H16C | 0.326916   | 0.512129   | 0.115415   | 0.082      |
| C17  | 0.2010(2)  | 0.6722(3)  | 0.0926(3)  | 0.0661(16) |
| H17A | 0.161698   | 0.668300   | 0.082728   | 0.099      |
| H17B | 0.206200   | 0.707611   | 0.070952   | 0.099      |
| H17C | 0.222638   | 0.677838   | 0.137081   | 0.099      |
| C18  | 0.2073(2)  | 0.5550(3)  | 0.0960(3)  | 0.0683(14) |
| H18A | 0.167733   | 0.554073   | 0.085610   | 0.102      |
| H18B | 0.229035   | 0.552911   | 0.140731   | 0.102      |
| H18C | 0.216390   | 0.520096   | 0.076862   | 0.102      |
| N2A  | 0.27960(7) | 0.62157(8) | 0.08901(8) | 0.0349(4)  |
| C10A | 0.302(2)   | 0.584(2)   | 0.055(2)   | 0.0370(18) |
| C11A | 0.2620(5)  | 0.5657(5)  | -0.0058(5) | 0.064(2)   |
| H11C | 0.278599   | 0.534945   | -0.022701  | 0.077      |
| H11D | 0.251095   | 0.601578   | -0.033557  | 0.077      |
| C12A | 0.2077(4)  | 0.5369(6)  | -0.0018(5) | 0.073(2)   |
| H12C | 0.218161   | 0.501218   | 0.026113   | 0.088      |
| H12D | 0.179698   | 0.523969   | -0.043000  | 0.088      |
| C13A | 0.1823(4)  | 0.5951(6)  | 0.0266(5)  | 0.062(2)   |
| H13C | 0.176649   | 0.632577   | 0.001704   | 0.074      |
| H13D | 0.146523   | 0.583148   | 0.025772   | 0.074      |
| C14A | 0.2248(5)  | 0.6056(6)  | 0.0911(4)  | 0.0411(16) |
| C15A | 0.3473(5)  | 0.6245(6)  | 0.0523(5)  | 0.044(2)   |
| H15D | 0.363682   | 0.603996   | 0.028385   | 0.067      |
| H15E | 0.376072   | 0.632194   | 0.094145   | 0.067      |
| H15F | 0.331011   | 0.663437   | 0.032686   | 0.067      |
| C16A | 0.3266(5)  | 0.5244(5)  | 0.0967(5)  | 0.053(2)   |
| H16D | 0.343453   | 0.497756   | 0.077192   | 0.080      |
| H16E | 0.296690   | 0.502485   | 0.100818   | 0.080      |
| H16F | 0.354670   | 0.536638   | 0.137499   | 0.080      |
| C17A | 0.2094(4)  | 0.6519(5)  | 0.1238(5)  | 0.055(2)   |
| H17D | 0.169384   | 0.650146   | 0.110636   | 0.082      |
| H17E | 0.219370   | 0.692309   | 0.114551   | 0.082      |
| H17F | 0.229049   | 0.644285   | 0.168144   | 0.082      |
| C18A | 0.2292(4)  | 0.5579(6)  | 0.1343(6)  | 0.070(3)   |
| H18D | 0.193717   | 0.553577   | 0.136138   | 0.105      |
| H18E | 0.258137   | 0.568533   | 0.175132   | 0.105      |
| H18F | 0.238611   | 0.519306   | 0.120779   | 0.105      |
| C19  | 0.51820(7) | 0.79215(8) | 0.13789(8) | 0.0196(4)  |
| C20  | 0.52709(8) | 0.77282(9) | 0.08185(9) | 0.0272(4)  |
| H20A | 0.491310   | 0.759234   | 0.048595   | 0.033      |
| H20B | 0.539732   | 0.808635   | 0.066550   | 0.033      |
| C21  | 0.56921(9) | 0.72171(9) | 0.09642(9) | 0.0298(4)  |
| H21A | 0.606124   | 0.736057   | 0.126670   | 0.036      |
| H21B | 0.571854   | 0.709207   | 0.058538   | 0.036      |
| C22  | 0.55100(8) | 0.66763(9) | 0.12271(9) | 0.0251(4)  |
| H22A | 0.579100   | 0.634881   | 0.133592   | 0.030      |
| H22B | 0.515711   | 0.651432   | 0.090653   | 0.030      |
| C23  | 0.54311(7) | 0.68420(8) | 0.17998(8) | 0.0185(3)  |
| C24  | 0.46758(8) | 0.83436(9) | 0.11477(9) | 0.0269(4)  |
| H24A | 0.472927   | 0.868209   | 0.091493   | 0.040      |

|      |            |             |             |           |
|------|------------|-------------|-------------|-----------|
| H24B | 0.463018   | 0.850562    | 0.149964    | 0.040     |
| H24C | 0.434433   | 0.811269    | 0.088080    | 0.040     |
| C25  | 0.56786(8) | 0.82959(8)  | 0.18306(9)  | 0.0255(4) |
| H25A | 0.570468   | 0.867667    | 0.163256    | 0.038     |
| H25B | 0.601931   | 0.805910    | 0.194889    | 0.038     |
| H25C | 0.562843   | 0.839046    | 0.219814    | 0.038     |
| C26  | 0.51522(8) | 0.62998(8)  | 0.19461(9)  | 0.0241(4) |
| H26A | 0.537459   | 0.593127    | 0.199685    | 0.036     |
| H26B | 0.478207   | 0.623952    | 0.160796    | 0.036     |
| H26C | 0.512097   | 0.638092    | 0.232742    | 0.036     |
| C27  | 0.59985(8) | 0.69257(9)  | 0.23643(9)  | 0.0273(4) |
| H27A | 0.618156   | 0.652832    | 0.248911    | 0.041     |
| H27B | 0.594346   | 0.710234    | 0.270483    | 0.041     |
| H27C | 0.623001   | 0.719955    | 0.225650    | 0.041     |
| C28  | 0.43591(8) | 0.90769(9)  | 0.39572(8)  | 0.0245(4) |
| C29  | 0.44225(9) | 0.97736(9)  | 0.39691(9)  | 0.0314(5) |
| H29A | 0.419117   | 0.993657    | 0.355205    | 0.038     |
| H29B | 0.428324   | 0.994850    | 0.425096    | 0.038     |
| C30  | 0.50149(9) | 0.99782(9)  | 0.41740(9)  | 0.0325(5) |
| H30A | 0.524339   | 0.985431    | 0.460640    | 0.039     |
| H30B | 0.502906   | 1.042868    | 0.415028    | 0.039     |
| C31  | 0.52428(9) | 0.96906(9)  | 0.37626(9)  | 0.0309(4) |
| H31A | 0.563313   | 0.981763    | 0.390591    | 0.037     |
| H31B | 0.503015   | 0.984301    | 0.333717    | 0.037     |
| C32  | 0.52130(7) | 0.89904(8)  | 0.37603(8)  | 0.0220(4) |
| C33  | 0.37425(9) | 0.89261(11) | 0.36199(10) | 0.0384(5) |
| H33A | 0.354416   | 0.914032    | 0.381744    | 0.058     |
| H33B | 0.369018   | 0.848488    | 0.363617    | 0.058     |
| H33C | 0.359781   | 0.905646    | 0.318976    | 0.058     |
| C34  | 0.45670(9) | 0.88248(9)  | 0.46152(9)  | 0.0316(5) |
| H34A | 0.431697   | 0.895581    | 0.478814    | 0.047     |
| H34B | 0.494022   | 0.898037    | 0.487153    | 0.047     |
| H34C | 0.457609   | 0.837781    | 0.460473    | 0.047     |
| C35  | 0.53536(8) | 0.87578(9)  | 0.32518(9)  | 0.0271(4) |
| H35A | 0.571621   | 0.891587    | 0.331841    | 0.041     |
| H35B | 0.507131   | 0.889766    | 0.285160    | 0.041     |
| H35C | 0.536338   | 0.831047    | 0.325908    | 0.041     |
| C36  | 0.56549(8) | 0.87318(10) | 0.43711(9)  | 0.0313(4) |
| H36A | 0.602412   | 0.881481    | 0.440257    | 0.047     |
| H36B | 0.560344   | 0.828995    | 0.438363    | 0.047     |
| H36C | 0.561840   | 0.892599    | 0.471574    | 0.047     |
| C37  | 0.32059(8) | 0.95043(8)  | 0.12662(8)  | 0.0233(4) |
| C38  | 0.28620(9) | 1.00868(9)  | 0.11634(10) | 0.0340(5) |
| H38A | 0.283365   | 1.018844    | 0.154670    | 0.041     |
| H38B | 0.305480   | 1.042827    | 0.107175    | 0.041     |
| C39  | 0.22840(9) | 1.00251(10) | 0.06410(11) | 0.0381(5) |
| H39A | 0.207251   | 1.040562    | 0.060184    | 0.046     |
| H39B | 0.230616   | 0.995555    | 0.024873    | 0.046     |
| C40  | 0.19938(8) | 0.94928(10) | 0.07730(10) | 0.0324(5) |
| H40A | 0.162238   | 0.944405    | 0.042362    | 0.039     |
| H40B | 0.194205   | 0.958731    | 0.114382    | 0.039     |
| C41  | 0.23088(7) | 0.88885(9)  | 0.08755(8)  | 0.0228(4) |

|      |             |             |             |           |
|------|-------------|-------------|-------------|-----------|
| C42  | 0.37251(8)  | 0.95758(9)  | 0.18803(10) | 0.0330(5) |
| H42A | 0.391383    | 0.995742    | 0.187732    | 0.050     |
| H42B | 0.397487    | 0.923066    | 0.193777    | 0.050     |
| H42C | 0.361818    | 0.958485    | 0.221790    | 0.050     |
| C43  | 0.33947(9)  | 0.94339(10) | 0.07555(10) | 0.0332(5) |
| H43A | 0.363154    | 0.977943    | 0.077061    | 0.050     |
| H43B | 0.306980    | 0.942492    | 0.035380    | 0.050     |
| H43C | 0.360280    | 0.905253    | 0.081688    | 0.050     |
| C44  | 0.20537(8)  | 0.84438(10) | 0.11618(10) | 0.0325(5) |
| H44A | 0.165907    | 0.839311    | 0.088610    | 0.049     |
| H44B | 0.209743    | 0.860448    | 0.155830    | 0.049     |
| H44C | 0.224042    | 0.804787    | 0.122505    | 0.049     |
| C45  | 0.22342(9)  | 0.86214(11) | 0.02565(9)  | 0.0344(5) |
| H45A | 0.184506    | 0.851125    | 0.000928    | 0.052     |
| H45B | 0.246580    | 0.825678    | 0.033047    | 0.052     |
| H45C | 0.234412    | 0.892614    | 0.003530    | 0.052     |
| C46  | 0.45656(8)  | 0.53804(8)  | 0.33662(8)  | 0.0211(4) |
| C47  | 0.46760(8)  | 0.50261(8)  | 0.39547(9)  | 0.0254(4) |
| H47A | 0.442399    | 0.517678    | 0.412301    | 0.030     |
| H47B | 0.459346    | 0.458862    | 0.385256    | 0.030     |
| C48  | 0.52708(8)  | 0.50908(9)  | 0.44423(9)  | 0.0290(4) |
| H48A | 0.552644    | 0.492463    | 0.428601    | 0.035     |
| H48B | 0.532468    | 0.485894    | 0.481539    | 0.035     |
| C49  | 0.53934(8)  | 0.57630(9)  | 0.45991(8)  | 0.0277(4) |
| H49A | 0.578235    | 0.580732    | 0.491234    | 0.033     |
| H49B | 0.515223    | 0.591588    | 0.478071    | 0.033     |
| C50  | 0.53019(7)  | 0.61551(8)  | 0.40361(8)  | 0.0209(4) |
| C51  | 0.39382(8)  | 0.53840(9)  | 0.29622(9)  | 0.0300(4) |
| H51A | 0.380113    | 0.496303    | 0.288420    | 0.045     |
| H51B | 0.385646    | 0.558575    | 0.257027    | 0.045     |
| H51C | 0.375617    | 0.560536    | 0.317375    | 0.045     |
| C52  | 0.48286(9)  | 0.50489(9)  | 0.30007(9)  | 0.0305(4) |
| H52A | 0.464100    | 0.465740    | 0.285073    | 0.046     |
| H52B | 0.522192    | 0.497658    | 0.326839    | 0.046     |
| H52C | 0.479052    | 0.530154    | 0.265033    | 0.046     |
| C53  | 0.53139(8)  | 0.68243(9)  | 0.42189(9)  | 0.0279(4) |
| H53A | 0.566188    | 0.690969    | 0.458282    | 0.042     |
| H53B | 0.500169    | 0.690659    | 0.431280    | 0.042     |
| H53C | 0.528591    | 0.708597    | 0.387816    | 0.042     |
| C54  | 0.57812(8)  | 0.60617(9)  | 0.38612(9)  | 0.0285(4) |
| H54A | 0.613135    | 0.617490    | 0.420997    | 0.043     |
| H54B | 0.572168    | 0.631855    | 0.350616    | 0.043     |
| H54C | 0.579569    | 0.563204    | 0.375624    | 0.043     |
| C55  | 0.20120(10) | 0.44307(10) | 0.33975(12) | 0.0382(5) |
| C56  | 0.21250(10) | 0.48399(11) | 0.29543(13) | 0.0478(6) |
| H56A | 0.184122    | 0.475959    | 0.252920    | 0.057     |
| H56B | 0.208950    | 0.527216    | 0.305088    | 0.057     |
| C57  | 0.26963(10) | 0.47416(11) | 0.29850(12) | 0.0458(6) |
| H57A | 0.274039    | 0.499946    | 0.267393    | 0.055     |
| H57B | 0.298541    | 0.485831    | 0.339675    | 0.055     |
| C58  | 0.27583(10) | 0.40737(11) | 0.28625(11) | 0.0412(6) |
| H58A | 0.313236    | 0.400660    | 0.289085    | 0.049     |

|      |              |              |             |            |
|------|--------------|--------------|-------------|------------|
| H58B | 0.248479     | 0.397122     | 0.243826    | 0.049      |
| C59  | 0.26748(8)   | 0.36473(9)   | 0.33125(10) | 0.0293(4)  |
| C60  | 0.13849(11)  | 0.44646(11)  | 0.32025(16) | 0.0621(9)  |
| H60A | 0.126919     | 0.489314     | 0.316121    | 0.093      |
| H60B | 0.130244     | 0.426619     | 0.351514    | 0.093      |
| H60C | 0.118425     | 0.425616     | 0.280717    | 0.093      |
| C61  | 0.23238(16)  | 0.46717(13)  | 0.40545(14) | 0.0703(10) |
| H61A | 0.217585     | 0.507239     | 0.408504    | 0.105      |
| H61B | 0.271799     | 0.471018     | 0.415935    | 0.105      |
| H61C | 0.227738     | 0.438709     | 0.434042    | 0.105      |
| C62  | 0.26371(11)  | 0.29959(11)  | 0.30717(15) | 0.0532(7)  |
| H62A | 0.296285     | 0.290825     | 0.300398    | 0.080      |
| H62B | 0.230169     | 0.295339     | 0.268269    | 0.080      |
| H62C | 0.262256     | 0.270805     | 0.337394    | 0.080      |
| C63  | 0.31807(10)  | 0.36727(13)  | 0.39407(12) | 0.0523(7)  |
| H63A | 0.350446     | 0.351223     | 0.390397    | 0.078      |
| H63B | 0.311113     | 0.342551     | 0.423651    | 0.078      |
| H63C | 0.325028     | 0.409673     | 0.408386    | 0.078      |
| C64  | -0.04103(8)  | 0.17506(9)   | 0.14135(8)  | 0.0253(4)  |
| C65  | -0.05258(9)  | 0.15229(10)  | 0.07698(9)  | 0.0346(5)  |
| H65A | -0.019939    | 0.129433     | 0.079452    | 0.042      |
| H65B | -0.084390    | 0.123810     | 0.062184    | 0.042      |
| C66  | -0.06525(10) | 0.20423(11)  | 0.03088(10) | 0.0429(6)  |
| H66A | -0.071277    | 0.187825     | -0.009676   | 0.051      |
| H66B | -0.099291    | 0.225811     | 0.025879    | 0.051      |
| C67  | -0.01646(11) | 0.24819(12)  | 0.05473(10) | 0.0457(6)  |
| H67A | -0.024368    | 0.282160     | 0.025065    | 0.055      |
| H67B | 0.016837     | 0.226565     | 0.057488    | 0.055      |
| C68  | -0.00438(9)  | 0.27456(9)   | 0.11835(9)  | 0.0315(5)  |
| C69  | -0.01728(10) | 0.12078(10)  | 0.18522(10) | 0.0396(5)  |
| H69A | -0.042134    | 0.085655     | 0.169339    | 0.059      |
| H69B | -0.013769    | 0.131764     | 0.226000    | 0.059      |
| H69C | 0.019238     | 0.110243     | 0.188343    | 0.059      |
| C70  | -0.09531(9)  | 0.19318(12)  | 0.14289(12) | 0.0460(6)  |
| H70A | -0.119252    | 0.157237     | 0.134398    | 0.069      |
| H70B | -0.114040    | 0.224473     | 0.111630    | 0.069      |
| H70C | -0.087386    | 0.209414     | 0.183644    | 0.069      |
| C71  | 0.05074(10)  | 0.30848(12)  | 0.14301(11) | 0.0521(7)  |
| H71A | 0.049637     | 0.338697     | 0.112655    | 0.078      |
| H71B | 0.080688     | 0.279303     | 0.150738    | 0.078      |
| H71C | 0.057296     | 0.329221     | 0.181471    | 0.078      |
| C72  | -0.04880(11) | 0.32117(11)  | 0.11205(12) | 0.0518(7)  |
| H72A | -0.047036    | 0.355901     | 0.087471    | 0.078      |
| H72B | -0.042452    | 0.335460     | 0.152978    | 0.078      |
| H72C | -0.085396    | 0.302057     | 0.091665    | 0.078      |
| C73  | 0.03434(8)   | 0.03234(9)   | 0.37763(9)  | 0.0276(4)  |
| C74  | -0.01559(9)  | -0.00660(10) | 0.33765(11) | 0.0377(5)  |
| H74A | -0.027495    | 0.003895     | 0.293866    | 0.045      |
| H74B | -0.004723    | -0.050182    | 0.343247    | 0.045      |
| C75  | -0.06394(10) | 0.00268(11)  | 0.35331(13) | 0.0469(6)  |
| H75A | -0.053215    | -0.009888    | 0.396342    | 0.056      |
| H75B | -0.095825    | -0.022540    | 0.325862    | 0.056      |

|      |              |             |             |            |
|------|--------------|-------------|-------------|------------|
| C76  | -0.07983(9)  | 0.06997(11) | 0.34505(13) | 0.0459(6)  |
| H76A | -0.111037    | 0.076500    | 0.355534    | 0.055      |
| H76B | -0.092557    | 0.081286    | 0.301324    | 0.055      |
| C77  | -0.03136(9)  | 0.11180(10) | 0.38551(10) | 0.0328(5)  |
| C78  | 0.07655(9)   | 0.02801(10) | 0.35152(11) | 0.0369(5)  |
| H78A | 0.085477     | -0.014962   | 0.348991    | 0.055      |
| H78B | 0.110292     | 0.050015    | 0.378507    | 0.055      |
| H78C | 0.060945     | 0.046195    | 0.310336    | 0.055      |
| C79  | 0.06286(10)  | 0.00571(10) | 0.44324(10) | 0.0424(6)  |
| H79A | 0.079146     | -0.034022   | 0.442160    | 0.064      |
| H79B | 0.035513     | 0.000618    | 0.459327    | 0.064      |
| H79C | 0.092058     | 0.033608    | 0.469933    | 0.064      |
| C80  | -0.04799(10) | 0.17755(11) | 0.36528(13) | 0.0461(6)  |
| H80A | -0.083448    | 0.186440    | 0.365806    | 0.069      |
| H80B | -0.051683    | 0.183222    | 0.323511    | 0.069      |
| H80C | -0.019551    | 0.205282    | 0.393507    | 0.069      |
| C81  | -0.02065(12) | 0.10718(12) | 0.45312(12) | 0.0519(7)  |
| H81A | -0.051952    | 0.124893    | 0.457878    | 0.078      |
| H81B | 0.013255     | 0.129510    | 0.479042    | 0.078      |
| H81C | -0.016405    | 0.064190    | 0.465583    | 0.078      |
| C82  | 0.27721(8)   | 0.24819(10) | 0.56663(9)  | 0.0335(5)  |
| C83  | 0.32433(9)   | 0.20704(13) | 0.61050(10) | 0.0481(6)  |
| H83A | 0.333748     | 0.177170    | 0.585932    | 0.058      |
| H83B | 0.357511     | 0.232469    | 0.633617    | 0.058      |
| C84  | 0.31003(10)  | 0.17306(14) | 0.65551(11) | 0.0532(7)  |
| H84A | 0.303248     | 0.202327    | 0.682580    | 0.064      |
| H84B | 0.341140     | 0.146171    | 0.681570    | 0.064      |
| C85  | 0.25867(12)  | 0.13531(12) | 0.61999(11) | 0.0521(7)  |
| H85A | 0.248817     | 0.113077    | 0.649348    | 0.063      |
| H85B | 0.266629     | 0.104681    | 0.594911    | 0.063      |
| C86  | 0.20942(10)  | 0.17456(11) | 0.57773(9)  | 0.0403(5)  |
| C87  | 0.29190(10)  | 0.26886(14) | 0.51538(11) | 0.0549(7)  |
| H87A | 0.328594     | 0.287940    | 0.533534    | 0.082      |
| H87B | 0.264352     | 0.298445    | 0.488960    | 0.082      |
| H87C | 0.292180     | 0.233444    | 0.490799    | 0.082      |
| C88  | 0.27367(11)  | 0.30556(12) | 0.60092(13) | 0.0533(7)  |
| H88A | 0.307613     | 0.329588    | 0.613296    | 0.080      |
| H88B | 0.269366     | 0.293649    | 0.637560    | 0.080      |
| H88C | 0.241759     | 0.330126    | 0.573820    | 0.080      |
| C89  | 0.16355(14)  | 0.13091(15) | 0.53620(12) | 0.0787(12) |
| H89A | 0.157577     | 0.099570    | 0.561520    | 0.118      |
| H89B | 0.174546     | 0.111389    | 0.506901    | 0.118      |
| H89C | 0.129211     | 0.153900    | 0.513666    | 0.118      |
| C90  | 0.18668(11)  | 0.21071(16) | 0.61543(13) | 0.0627(8)  |
| H90A | 0.170047     | 0.182561    | 0.633979    | 0.094      |
| H90B | 0.158519     | 0.239503    | 0.588553    | 0.094      |
| H90C | 0.216869     | 0.233279    | 0.647974    | 0.094      |
| N11  | 0.2084(8)    | 0.1077(9)   | 0.3077(6)   | 0.0258(17) |
| C91  | 0.2496(4)    | 0.0715(5)   | 0.3456(4)   | 0.0376(15) |
| C92  | 0.3036(2)    | 0.0753(3)   | 0.3378(2)   | 0.0501(12) |
| H92A | 0.319553     | 0.116681    | 0.349433    | 0.060      |
| H92B | 0.330736     | 0.045705    | 0.365995    | 0.060      |

|      |             |            |             |            |
|------|-------------|------------|-------------|------------|
| C93  | 0.29378(19) | 0.0618(2)  | 0.2721(2)   | 0.0419(11) |
| H93A | 0.278950    | 0.019941   | 0.260268    | 0.050      |
| H93B | 0.329048    | 0.064718   | 0.268763    | 0.050      |
| C94  | 0.2521(2)   | 0.1087(3)  | 0.2293(3)   | 0.0348(11) |
| H94A | 0.267735    | 0.150293   | 0.240560    | 0.042      |
| H94B | 0.245203    | 0.100797   | 0.186262    | 0.042      |
| C95  | 0.1977(4)   | 0.1050(4)  | 0.2342(4)   | 0.0256(13) |
| C96  | 0.2629(5)   | 0.0979(5)  | 0.4108(5)   | 0.063(3)   |
| H96A | 0.294784    | 0.076186   | 0.442104    | 0.094      |
| H96B | 0.230766    | 0.092445   | 0.419155    | 0.094      |
| H96C | 0.271631    | 0.141428   | 0.411990    | 0.094      |
| C97  | 0.2307(3)   | 0.0043(3)  | 0.3390(3)   | 0.0609(15) |
| H97A | 0.257565    | -0.019488  | 0.373519    | 0.091      |
| H97B | 0.228033    | -0.012251  | 0.300247    | 0.091      |
| H97C | 0.194354    | 0.002047   | 0.339101    | 0.091      |
| C98  | 0.16093(18) | 0.1583(2)  | 0.19836(18) | 0.0353(10) |
| H98A | 0.155274    | 0.156765   | 0.155554    | 0.053      |
| H98B | 0.178847    | 0.196935   | 0.217052    | 0.053      |
| H98C | 0.125083    | 0.155392   | 0.199512    | 0.053      |
| C99  | 0.1642(2)   | 0.0476(2)  | 0.2019(3)   | 0.0539(14) |
| H99A | 0.152643    | 0.050489   | 0.157573    | 0.081      |
| H99B | 0.131350    | 0.044651   | 0.209445    | 0.081      |
| H99C | 0.187216    | 0.011200   | 0.218295    | 0.081      |
| N11A | 0.2087(8)   | 0.1106(9)  | 0.2992(7)   | 0.0246(16) |
| C91A | 0.1959(5)   | 0.0934(5)  | 0.2440(5)   | 0.0337(16) |
| C92A | 0.2018(2)   | 0.0249(2)  | 0.2357(3)   | 0.0462(12) |
| H92C | 0.170366    | 0.003483   | 0.237987    | 0.055      |
| H92D | 0.198754    | 0.018029   | 0.193901    | 0.055      |
| C93A | 0.2535(3)   | -0.0032(3) | 0.2805(3)   | 0.0575(14) |
| H93C | 0.284811    | 0.012128   | 0.273421    | 0.069      |
| H93D | 0.251395    | -0.047978  | 0.274627    | 0.069      |
| C94A | 0.2640(3)   | 0.0120(3)  | 0.3478(3)   | 0.0558(15) |
| H94C | 0.236587    | -0.010114  | 0.357113    | 0.067      |
| H94D | 0.301295    | -0.002853  | 0.376523    | 0.067      |
| C95A | 0.2602(4)   | 0.0804(5)  | 0.3585(4)   | 0.0351(16) |
| C96A | 0.1358(3)   | 0.1090(4)  | 0.2040(2)   | 0.069(2)   |
| H96D | 0.123972    | 0.090708   | 0.163198    | 0.104      |
| H96E | 0.131562    | 0.153468   | 0.199892    | 0.104      |
| H96F | 0.113026    | 0.093004   | 0.222939    | 0.104      |
| C97A | 0.2322(4)   | 0.1274(4)  | 0.2202(4)   | 0.0614(19) |
| H97D | 0.216525    | 0.122865   | 0.175442    | 0.092      |
| H97E | 0.269681    | 0.110281   | 0.239291    | 0.092      |
| H97F | 0.233674    | 0.170776   | 0.230714    | 0.092      |
| C98A | 0.2521(5)   | 0.0829(5)  | 0.4161(6)   | 0.0430(19) |
| H98D | 0.281904    | 0.060239   | 0.449010    | 0.064      |
| H98E | 0.216353    | 0.064610   | 0.408146    | 0.064      |
| H98F | 0.252809    | 0.125543   | 0.428721    | 0.064      |
| C99A | 0.3135(2)   | 0.1112(4)  | 0.3676(3)   | 0.0657(17) |
| H99D | 0.344635    | 0.092460   | 0.402499    | 0.099      |
| H99E | 0.311642    | 0.154746   | 0.375807    | 0.099      |
| H99F | 0.318819    | 0.106419   | 0.330307    | 0.099      |
| C100 | 0.04312(8)  | 0.40672(9) | 0.44309(9)  | 0.0289(4)  |

|      |              |             |             |           |
|------|--------------|-------------|-------------|-----------|
| C101 | -0.00032(10) | 0.41389(13) | 0.46661(11) | 0.0489(6) |
| H10A | -0.006929    | 0.373665    | 0.480786    | 0.059     |
| H10B | 0.014111     | 0.441745    | 0.502484    | 0.059     |
| C102 | -0.05435(10) | 0.43851(16) | 0.41900(14) | 0.0667(9) |
| H10C | -0.048952    | 0.480501    | 0.407513    | 0.080     |
| H10D | -0.081571    | 0.440162    | 0.436140    | 0.080     |
| C103 | -0.07628(9)  | 0.39785(12) | 0.36227(12) | 0.0446(6) |
| H10E | -0.110975    | 0.415635    | 0.330596    | 0.054     |
| H10F | -0.085153    | 0.357150    | 0.373325    | 0.054     |
| C104 | -0.03495(8)  | 0.39025(9)  | 0.33516(9)  | 0.0239(4) |
| C105 | 0.09140(12)  | 0.36994(13) | 0.49063(11) | 0.0603(8) |
| H10G | 0.106259     | 0.391035    | 0.530376    | 0.090     |
| H10H | 0.120514     | 0.365952    | 0.476983    | 0.090     |
| H10I | 0.078354     | 0.329273    | 0.494961    | 0.090     |
| C106 | 0.06694(11)  | 0.46889(12) | 0.43887(12) | 0.0500(6) |
| H10J | 0.086543     | 0.486406    | 0.480176    | 0.075     |
| H10K | 0.036787     | 0.496224    | 0.413041    | 0.075     |
| H10L | 0.092768     | 0.463911    | 0.420690    | 0.075     |
| C107 | -0.05646(9)  | 0.33879(11) | 0.28784(10) | 0.0370(5) |
| H10M | -0.093896    | 0.348740    | 0.256731    | 0.055     |
| H10N | -0.057352    | 0.300617    | 0.308484    | 0.055     |
| H10O | -0.031938    | 0.334007    | 0.267956    | 0.055     |
| C108 | -0.03275(12) | 0.44783(12) | 0.30095(13) | 0.0570(7) |
| H10P | -0.068921    | 0.454604    | 0.265935    | 0.085     |
| H10Q | -0.004543    | 0.442992    | 0.286059    | 0.085     |
| H10R | -0.023362    | 0.482902    | 0.328871    | 0.085     |

$U_{eq}$  is defined as 1/3 of the trace of the orthogonalized  $U_{ij}$  tensor.

## References

- [1C2] *APEX4 Suite of Crystallographic Software, Version 2021-10.0*, Bruker AXS Inc., Madison, Wisconsin, USA, **2021**.
- [2C2] Bruker, *SAINT, V8.40B*, Bruker AXS Inc., Madison, Wisconsin, USA.
- [3C2] L. Krause, R. Herbst-Irmer, G. M. Sheldrick, D. Stalke, *J. Appl. Cryst.* **2015**, *48*, 3–10, doi:10.1107/S1600576714022985.
- [4C2] G. M. Sheldrick, *Acta Cryst.* **2015**, *A71*, 3–8, doi:10.1107/S2053273314026370.
- [5C2] G. M. Sheldrick, *Acta Cryst.* **2015**, *C71*, 3–8, doi:10.1107/S2053229614024218.
- [6C2] C. B. Huebschle, G. M. Sheldrick, B. Dittrich, *J. Appl. Cryst.* **2011**, *44*, 1281–1284, doi:10.1107/S0021889811043202.
- [7C2] D. Kratzert, J. J. Holstein, I. Krossing, *J. Appl. Cryst.*, 2015, **48**, 933–938.
- [8C2] Ed. E. Prince, *International Tables for Crystallography Volume C, Mathematical, Physical and Chemical Tables*, International Union of Crystallography, Chester, England, **2006**, 500–502; 219–222; 193–199.
- [9C2] C. R. Groom, I. J. Bruno, M. P. Lightfoot, S. C. Ward, *Acta Cryst.* **2016**, *B72*, 171–179, doi:10.1107/S2052520616003954.
- [10C2] D. Kratzert, *FinalCif, V106*, <https://dkratzert.de/finalcif.html>.
- [11C2] K. Momma, F. Izumi, *J. Appl. Crystallogr.* **2011**, *44*, 1272–1276.



## Computational Data

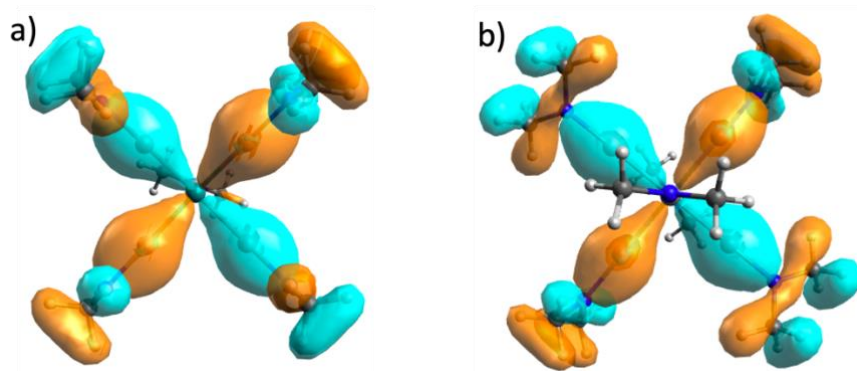

Figure S 19: Excerpt of the occupied molecular orbitals of **1**<sub>NMe<sub>2</sub> (a) and **2**<sub>NMe<sub>2</sub> (b) showing  $\sigma$  bonding between the GaNMe<sub>2</sub> ligand and the transition metal (HOMO-14 and HOMO-15 respectively).</sub></sub>

[Ru(GaTMP)<sub>5</sub>]:

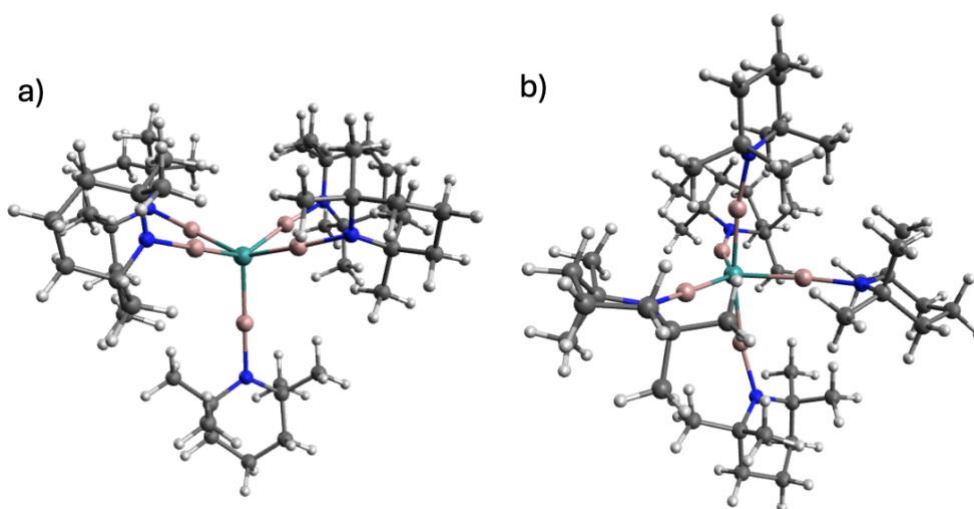

Figure S 20: Optimized structure of a) **1**<sub>SP</sub> and b) **1**<sub>TB</sub>.

**1**<sub>SP</sub> xyz Coordinates:

```

Ru 10.9625336746 4.8135270062 14.0514953028
Ga 8.9579178587 4.2189633336 15.0126425439
Ga 9.8770435308 4.0789227423 12.1584183817
Ga 10.9386770320 7.1139679443 14.0382222113
N 7.2652546234 3.6652428843 15.5932863857
N 8.7726702528 3.4898159543 10.7665230187
N 10.9056697601 9.0005334848 14.1097230863
C 4.8301064920 4.1317936911 15.7352420791
C 5.8713449542 2.4080402624 17.2133004052
C 5.8600405684 3.4841309639 13.4978390880

```

```

C 6.3877457719 5.6884313486 14.5450005207
C 7.2395033664 1.1420891350 15.4789396073
C 8.3745323128 2.3658680583 17.3308440194
C 6.7269503017 4.0169690516 9.4723890665
C 7.3005757982 1.6429504311 10.0095849464
C 8.9966597734 4.7891277876 8.6109386698
C 8.0069629197 5.8108922599 10.6579394186
C 9.7579611560 1.6503612586 9.3411495329
C 9.0920813914 1.2570767085 11.7104041606
C 11.9601551507 9.7222856711 14.8645940913
C 10.7970217487 11.9725808586 14.3461227313
C 12.1092358699 11.1619727122 14.3254773931

```

C 10.1311397123 10.0411664024 11.9715884888  
C 8.5193821530 8.9054217694 13.5098876655  
Ga 12.9762646072 4.1807476768 13.1316079506  
Ga 12.0165675792 4.1605201435 15.9903427778  
N 14.6709382700 3.5625324678 12.6160072475  
N 13.0698825507 3.6214094338 17.4389295818  
C 17.1316882719 3.8901040023 12.5946050529  
C 16.0883749377 2.1383904310 11.1544129397  
C 15.9511821866 3.4066585609 14.7944389532  
C 15.5976966386 5.5841805791 13.6232781188  
C 14.5230240929 1.0518010290 12.8404208859  
C 13.6018440528 2.2551398413 10.8595580861  
C 15.0999086614 4.1835746563 18.7428303443  
C 14.5138788787 1.7937841044 18.2906799962  
C 12.8229177704 5.0056346964 19.5388150788  
C 13.8515563602 5.9394818413 17.4703982589  
C 12.0494266427 1.8525301282 18.9262226615  
C 12.7399213860 1.3523272157 16.5841297374  
C 11.6380958506 9.7373499476 16.3815887469  
C 13.3038039387 8.9884343959 14.6686072505  
H 12.4300502316 10.2532915148 16.9654349045  
H 11.5543556388 8.6957918508 16.7559121577  
H 10.6734755076 10.2384957270 16.5905802071  
H 13.5838976976 8.9660529347 13.5964457460  
H 13.2414946906 7.9356340195 15.0244277242  
H 14.1177305163 9.4785974290 15.2415144565  
H 12.8999806927 11.6855973466 14.9030753030  
H 12.4888106437 11.0840429407 13.2857526905  
C 9.5483152860 11.0751641443 14.2234093006  
H 10.8197263768 12.7146616193 13.5213152336  
H 10.7241165747 12.5657065981 15.2812711033  
C 9.8063427032 9.7558640850 13.4611196930  
H 10.3004206797 9.0839321851 11.4366468426  
H 11.0492705293 10.6489235430 11.8592948055  
H 9.2999060960 10.5794418249 11.4680106245  
H 8.6603166301 7.9342194048 12.9847899662  
H 7.6756085754 9.4246478261 13.0107952100  
H 8.2328982865 8.6850979071 14.5578911945  
H 8.7209825772 11.6249473703 13.7269729730  
H 9.1749928126 10.8035079140 15.2327060104  
C 17.2880334583 2.4717766675 12.0428883480  
H 18.2316312596 2.3845600414 11.4644275089  
H 17.3702136381 1.7398736750 12.8758689428  
C 15.8224164312 4.0749305659 13.3984401742  
H 17.1187640365 4.6042916644 11.7420232113  
H 17.9938768686 4.1687949135 13.2372986592  
H 15.4866436501 6.1115975671 12.6549751853  
H 16.4447606700 6.0320247059 14.1812643287  
H 14.6770073613 5.7741481764 14.2195026956  
H 16.1972883397 2.3301673774 14.7256890104  
H 15.0000578503 3.4958111234 15.3598752063  
H 16.7489714372 3.8917284257 15.3953985252  
C 14.7386554933 2.2673285545 11.9010305197  
H 16.1730063927 1.1147802623 10.7310032812  
H 16.0771542632 2.8434716075 10.2942680053  
H 13.6897826785 3.1199813023 10.1719471083  
H 12.6058876085 2.3088206831 11.3547338405  
H 13.6142125650 1.3204281703 10.2631422014  
H 14.4599169910 0.1044601896 12.2651970356  
H 13.5753082257 1.1779014626 13.4038452141  
H 15.3394394035 0.9406602090 13.5785306276  
C 8.7348143902 2.0457210229 10.4363213734  
H 9.5011654688 2.0649644059 8.3488279705  
H 9.8146578089 0.5470682437 9.2345802765  
H 10.7649644444 2.0266333716 9.6114890625  
H 9.0315899020 0.1655973182 11.5258582574  
H 8.3999773155 1.5111052469 12.5380954158  
H 10.1276615138 1.4745593987 12.0543903201  
C 6.7107988034 2.5782805391 8.9526750966  
H 6.6526392401 1.6711949847 10.9130108018  
H 7.3097442468 0.5910068499 9.6524838899  
H 7.2845180220 2.5034415782 8.0036217266  
H 5.6726237765 2.2712010332 8.7064420788  
C 8.1459092619 4.4922232884 9.8723919935  
H 8.5748679093 5.6447833626 8.0438447365  
H 9.0460058057 3.9264057566 7.9213211485  
H 10.0343651809 5.0433539331 8.9074574252  
H 6.0786134259 4.0785616995 10.3738254227  
H 6.3050135874 4.7188472701 8.7216925023  
H 7.4994804331 6.5820891271 10.0445257631  
H 9.0000928560 6.2204588690 10.9462372057  
H 7.4180086216 5.6572469113 11.5843126381  
C 15.0976106490 2.7660237891 19.3173278346  
H 16.1301407296 2.4610086016 19.5886659319  
H 14.5119182645 2.7322690053 20.2615507201  
C 13.0892759659 2.1916470810 17.8279355138  
H 13.4493325536 1.5530227378 15.7567695425  
H 11.7145073692 1.5709495357 16.2121286877  
H 12.7775355711 0.2699622442 16.8207142529  
H 14.4897969869 0.7575342001 18.6905259826  
H 15.1740782325 1.7786092373 17.3960550208  
H 11.0522481618 2.2377069524 18.6343330424  
H 12.3059629675 2.2953378266 19.9062390313  
H 11.9717746298 0.7547539454 19.0698071699  
C 13.6904872823 4.6532011592 18.3034158203  
H 14.4584597926 5.7485683281 16.5626023563  
H 14.3505187000 6.7316444833 18.0636088932  
H 12.8667976376 6.3430000918 17.1469589081  
H 15.7618068028 4.2060123680 17.8495353792  
H 15.5162192107 4.9104199521 19.4726692791  
H 11.7906249033 5.2511517468 19.2171370630  
H 13.2405272916 5.8833907058 20.0743543180  
H 12.7601429384 4.1740615413 20.2646272421  
C 7.1695252767 2.4092795883 16.3706773971  
H 8.1517343560 1.1774217052 14.8483934635  
H 6.3688255403 1.0543924199 14.8027716134  
H 7.2797848787 0.2194927509 16.0948921089  
H 9.3334428318 2.3276392945 16.7664032801  
H 8.3436300528 1.4624021544 17.9727530077  
H 8.3917554505 3.2639472719 17.9805714251  
C 4.6344678147 2.7608148572 16.3852663877  
H 5.9873592813 3.1636498207 18.0209980554

H 5.7569823827 1.4197367098 17.7076900948  
H 4.4507420771 1.9838199734 15.6112198202  
H 3.7302389031 2.7682711278 17.0295394034  
C 6.0996881490 4.2045964684 14.8515562383  
H 6.7871206285 3.4832395403 12.8864424201  
H 5.0665702807 3.9946085272 12.9123537424  
H 5.5461806609 2.4311078163 13.6284945410  
H 7.2848026099 5.8057866747 13.8969637041  
H 6.5737994021 6.2522166990 15.4809962390  
H 5.5364488709 6.1548198075 14.0093739252  
H 4.9265679624 4.8946442230 16.5386492661  
H 3.9465777167 4.4164654239 15.1249325111

**1<sub>TB</sub> xyZ Coordinates:**

Ru 10.9960661057 5.2950792211 14.7553608959  
Ga 8.9365156732 4.5952911650 15.5242060805  
Ga 10.1812988955 4.5766342018 12.7372900256  
Ga 10.8261779161 7.6012877159 14.9345262222  
N 7.2884104954 3.7613663868 15.8493753990  
N 9.4678463089 3.8613586937 11.1616235026  
N 10.6129452030 9.4187172177 14.4612604936  
C 4.8222482441 3.7734522587 15.5758516734  
C 5.8923694881 2.2620899468 17.2520466376  
C 6.3031847053 3.2933354109 13.5646995946  
C 6.2554597976 5.5724354064 14.5845626443  
C 7.7561108540 1.2819711847 15.8179847103  
C 8.2926349470 2.6989076814 17.8031421131  
C 7.5936662334 4.0023578549 9.5435611500  
C 8.5796213029 1.7825466063 10.1391115300  
C 9.7364573791 5.3062317068 9.1065748820  
C 8.2288640347 5.9544547202 10.9780153884  
C 11.0504638696 2.3497192913 9.9049345633  
C 10.1121617717 1.7058383444 12.1185784118  
C 11.4517973930 10.4822032574 15.0573435648  
C 10.5573071926 12.1794782262 13.3238447906  
C 11.7962790845 11.5408116625 13.9839752345  
C 10.3224333920 9.3402959684 11.9843149240  
C 8.3831369647 8.9355841143 13.5198222913  
Ga 13.0269030191 5.3174201118 13.6761095294  
Ga 11.9752558654 3.7392130791 16.1433800546  
N 14.5661679606 5.1868654999 12.6183635416  
N 12.8671204094 2.3114802125 16.9706872567  
C 16.7538761436 4.1390831383 12.0922510939  
C 16.0035200151 6.1678013058 10.8469534696  
C 14.6306204276 2.7380649672 11.9985485962  
C 15.5075561514 3.5673784136 14.1859176636  
C 13.6237363989 5.4687472679 10.2907897345  
C 14.0485781919 7.4224406840 11.7896939795  
C 14.9843309525 1.7303315275 18.1235086535  
C 13.9360125795 0.1174726624 16.5274945855  
C 12.9248177362 2.3343157688 19.4953497329  
C 14.0924595164 4.0700105005 18.1443352448  
C 11.5389453532 0.2005836791 17.3795778447  
C 12.0848257091 0.9725076643 15.0782880777

C 10.7507496573 11.1377428379 16.2750577105  
C 12.7696116213 9.8530963573 15.5517095094  
H 11.3841295131 11.9260693751 16.7348068968  
H 10.5424103412 10.3651416475 17.0430587147  
H 9.7824801525 11.5946790383 15.9965154446  
H 13.3259180311 9.3930438738 14.7095011509  
H 12.5764799579 9.0589038658 16.3080599075  
H 13.4205457068 10.6094277021 16.0363142251  
H 12.4439692758 12.3223044554 14.4345919233  
H 12.4140373561 11.0327336122 13.2141715956  
C 9.3317938168 11.2447041974 13.3478774781  
H 10.8085415656 12.4603061172 12.2798933606  
H 10.2945785083 13.1293671715 13.8341293128  
C 9.6877233741 9.7419995389 13.3417536544  
H 10.5665105901 8.2572144275 11.9953164414  
H 11.2674658780 9.8854807218 11.7954993800  
H 9.6351160632 9.5317774944 11.1329170473  
H 8.5923035530 7.8437733342 13.5432653542  
H 7.6780088085 9.1208774704 12.6832605946  
H 7.8864735059 9.2052827692 14.4732017857  
H 8.6629391314 11.4557018676 12.4871041596  
H 8.7270448185 11.4378713793 14.2577168973  
C 16.7205309251 4.8221619432 10.7239988158  
H 17.7528720449 4.9686789073 10.3427719990  
H 16.2077135842 4.1764048129 9.9782710931  
C 15.3433309184 3.9272083057 12.6952252477  
H 17.3327623650 4.7794131328 12.7932066930  
H 17.2774542535 3.1606304250 12.0416817216  
H 15.9906217380 4.4010456355 14.7337758064  
H 16.1263120577 2.6551225737 14.3069013649  
H 14.5309566007 3.3546076040 14.6754276486  
H 14.5527335723 2.8748639798 10.9035307992  
H 13.5986750379 2.6289898005 12.3936682309  
H 15.1694796338 1.7846522848 12.1792668285  
C 14.5635142759 6.0236491141 11.3928374822  
H 15.9719039803 6.6974157503 9.8709577751  
H 16.5756530117 6.8138170579 11.5483111758  
H 14.6797230175 7.8530922443 12.5923966297  
H 12.9995294479 7.3837646595 12.1611355813  
H 14.0546854739 8.1102176638 10.9200824266  
H 13.5290791137 6.1797738076 9.4437513819  
H 12.6095118495 5.2956545006 10.7076176021  
H 13.9785506017 4.5055628898 9.8783908317  
C 9.7989963703 2.4598469027 10.8121650439  
H 10.8778267892 2.7618239266 8.8937117021  
H 11.3595940273 1.2906741629 9.7841461247  
H 11.8938845774 2.9088055186 10.3561524762  
H 10.3277823720 0.6379886099 11.9140454441  
H 9.2603780399 1.7623358808 12.8263932884  
H 11.0053560732 2.1280440258 12.6284240878  
C 7.9858771809 2.6242912197 9.0077593427  
H 7.7988989251 1.6264886435 10.9158425331  
H 8.8770544519 0.7760462134 9.7745331455  
H 8.7167721208 2.7268878652 8.1764496576  
H 7.1000768302 2.1143586688 8.5742179831  
C 8.7838991409 4.7503147293 10.1953220927

H 9.2158561476 6.0563718628 8.4756462481  
 H 10.1227763796 4.5183938901 8.4341152239  
 H 10.6087458308 5.7994343903 9.5804806745  
 H 6.8036716714 3.8736126375 10.3156649064  
 H 7.1601617187 4.6365488132 8.7411232643  
 H 7.6921200756 6.6521931371 10.3045680746  
 H 9.0457630950 6.5345670342 11.4606246392  
 H 7.5275724257 5.6223100890 11.7688446495  
 C 14.7065210277 0.2524813756 17.8421555624  
 H 15.6596026380 -0.3146071961 17.7895894589  
 H 14.1279733995 -0.1985231607 18.6772188148  
 C 12.6119387336 0.9219522549 16.5242149113  
 H 12.8130801656 1.4708464245 14.4070641930  
 H 11.1274345538 1.5331948980 15.0135162182  
 H 11.8967891568 -0.0489646220 14.6918445707  
 H 13.7167029769 -0.9473918082 16.2985747966  
 H 14.5725268959 0.5017776524 15.7001686811  
 H 10.6259705781 0.8242588150 17.4442046623  
 H 11.8817377786 -0.0009292530 18.4111485851  
 H 11.2640183396 -0.7737517900 16.9249761327  
 C 13.6911212631 2.5826239655 18.1707017401  
 H 14.6322254441 4.3207787821 17.2084715406  
 H 14.7498999937 4.3153418868 19.0027472074  
 H 13.2017230284 4.7336969801 18.2157082664  
 H 15.6295059991 2.1322945849 17.3113971310

H 15.5421975472 1.8600253215 19.0754141252  
 H 11.9610750723 2.8822821544 19.4809530939  
 H 13.5155820684 2.6900563897 20.3650517246  
 H 12.6998882382 1.2649670121 19.6643042287  
 C 7.2942702837 2.5118711738 16.6442372817  
 H 8.7267359026 1.5024076726 15.3270724392  
 H 7.0351018865 1.0137143975 15.0234422250  
 H 7.8898763486 0.3893188894 16.4638607983  
 H 9.3306348836 2.8364761868 17.4261192464  
 H 8.3060908427 1.8087909481 18.4640479796  
 H 8.0279708998 3.5892948213 18.4076921193  
 C 4.7678056944 2.3883848777 16.2230566480  
 H 5.7277348484 3.0170588652 18.0517237507  
 H 5.8798319810 1.2646373437 17.7411865349  
 H 4.8542648155 1.5931878793 15.4507080999  
 H 3.7829587303 2.2315067744 16.7111516890  
 C 6.1866553523 4.0662533487 14.9056625843  
 H 7.3005041390 3.4540042624 13.1045100221  
 H 5.5353451825 3.6378095784 12.8403129479  
 H 6.1681265599 2.2029084508 13.6923938951  
 H 7.2160617724 5.8389202112 14.0893884776  
 H 6.1726849821 6.1753664694 15.5108384400  
 H 5.4427927731 5.8688094089 13.8911148259  
 H 4.6537387927 4.5408317658 16.3630055590  
 H 4.0130957740 3.8973167117 14.8247327269

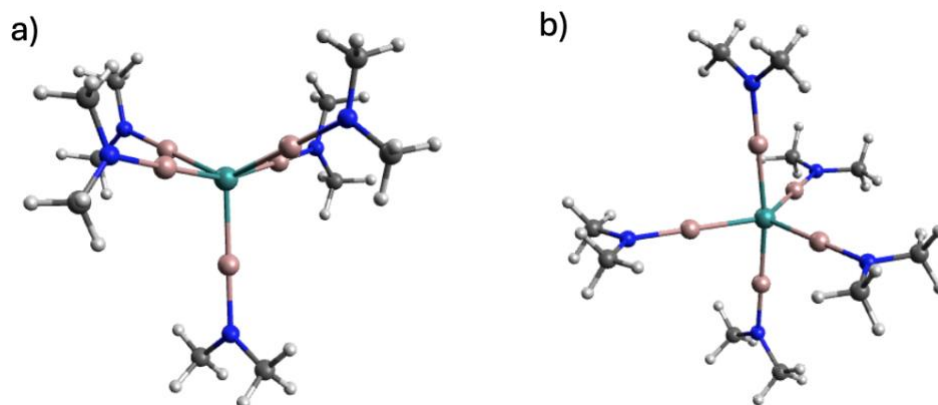

Figure S 21: Optimized structure of a)  $1NMe_2 SP$  and b)  $1NMe_2 TB$ .

**$1NMe_2 SP$  xyz Coordinates:**

Ru 10.9097358574 4.6220579939 14.1831367948  
 Ga 8.9098995421 3.8123330315 15.0168153896  
 Ga 10.0241848266 4.2400610219 12.0795669431  
 Ga 10.9083481843 6.9284299560 14.1880693506  
 N 7.3113955296 3.1623922225 15.6814441479  
 N 9.3120987181 3.8914865989 10.4135840070  
 N 10.9079192730 8.7889013009 14.1935084266  
 C 11.9931034639 9.5839961292 13.6503876482  
 Ga 12.9113134578 3.8185830582 13.3474117086  
 Ga 11.7941575450 4.2340036287 16.2860280201  
 N 14.5118322691 3.1730056029 12.6832350906

N 12.5040472232 3.8819937845 17.9521852793  
 C 9.8220277624 9.5802973578 14.7406120450  
 C 15.5931862892 4.0340911333 12.2448096291  
 C 14.7932701938 1.7564164804 12.5510796505  
 C 9.0377645151 2.5467663862 9.9448285943  
 C 8.9783485467 4.9329889811 9.4613869823  
 C 12.7808112046 2.5365883681 18.4175038119  
 C 12.8344258341 4.9215923528 18.9076396581  
 C 7.0305103406 1.7449560055 15.8053277799  
 C 6.2302336046 4.0205645186 16.1259793733  
 H 7.9023119141 4.9207716420 9.1999845041  
 H 9.5472229307 4.8239854287 8.5175937143  
 H 9.2083922870 5.9252107611 9.8758519142

H 7.9644534048 2.4037895406 9.7124382771  
H 9.3134566020 1.8063238141 10.7098341566  
H 9.6079961288 2.3073770468 9.0261731177  
H 9.0308034741 8.9285745015 15.1403758710  
H 9.3609281267 10.2349237707 13.9747400724  
H 10.1640142708 10.2358070815 15.5658559343  
H 11.6507686577 10.2432099378 12.8282360946  
H 12.7850712185 8.9349749650 13.2477136055  
H 12.4533643967 10.2353113315 14.4195749340  
H 14.9945656890 1.4732342378 11.4994272331  
H 13.9383400716 1.1580997878 12.8986927868  
H 15.6771474026 1.4553569618 13.1467040550  
H 15.8396767761 3.8732628622 11.1771052355  
H 16.5196376864 3.8583317362 12.8255947393  
H 15.3193367940 5.0920872683 12.3674610326  
H 12.6026483052 5.9144491691 18.4956642235  
H 13.9101782372 4.9110447955 19.1702847237  
H 12.2646690002 4.8086650527 19.8504308146  
H 12.5074971677 1.7976703013 17.6501789959  
H 12.2101091770 2.2934776592 19.3348867449  
H 13.8541762520 2.3952418618 18.6506504304  
H 6.5035562732 5.0793347961 16.0089739656  
H 5.9851444690 3.8536157911 17.1930612220  
H 5.3031255699 3.8477345721 15.5453579742  
H 7.8852183537 1.1490215412 15.4531049560  
H 6.1460030236 1.4471748947 15.2089883757  
H 6.8306301584 1.4553496971 16.8554988393

**1<sub>NMe2</sub> TB xyz Coordinates:**

Ru 10.7952760000 4.6513340000 13.9973720000  
Ga 8.7759520000 3.7144370000 14.6245350000  
Ga 9.9357500000 4.8118980000 11.8541710000  
Ga 10.9358010000 6.9293790000 14.3357000000  
N 7.1590560000 2.9699020000 15.1337100000  
N 9.2390990000 4.9373470000 10.1512300000  
N 11.0575650000 8.7659000000 14.6010700000  
C 12.1934920000 9.5554420000 14.1624060000  
Ga 12.7199180000 3.7437210000 13.0887050000  
Ga 11.5964710000 4.0750480000 16.0908770000  
N 14.2699700000 3.0303340000 12.3672030000

N 12.2210470000 3.5976490000 17.7591020000  
C 10.0273060000 9.5434980000 15.2641730000  
C 15.4492080000 3.8264590000 12.0848440000  
C 14.4068160000 1.6298140000 12.0154750000  
C 8.8782730000 3.7781230000 9.3579490000  
C 9.0217610000 6.2068150000 9.4843620000  
C 12.4546680000 2.2201630000 18.1479790000  
C 12.5381200000 4.5691000000 18.7881960000  
C 6.8869370000 1.5472830000 15.0588350000  
C 6.0497220000 3.7575420000 15.6362370000  
H 7.9576660000 6.3514290000 9.2143650000  
H 9.6124470000 6.2870540000 8.5511900000  
H 9.3152480000 7.0422960000 10.1364910000  
H 7.8061270000 3.7885170000 9.0813020000  
H 9.0679190000 2.8510500000 9.9181590000  
H 9.4606340000 3.7262450000 8.4175020000  
H 9.1948750000 8.8962840000 15.5777380000  
H 9.6106500000 10.3267820000 14.6008070000  
H 10.4142340000 10.0525900000 16.1687030000  
H 11.8953100000 10.3401780000 13.4396490000  
H 12.9414570000 8.9170650000 13.6691710000  
H 12.6940480000 10.0634510000 15.0099670000  
H 14.6130280000 1.4946980000 10.9356470000  
H 13.4830960000 1.0802550000 12.2489040000  
H 15.2341480000 1.1457770000 12.5703710000  
H 15.7080310000 3.8121240000 11.0079950000  
H 16.3346140000 3.4596170000 12.6398900000  
H 15.2865020000 4.8750310000 12.3741260000  
H 12.3392870000 5.5902650000 18.4317370000  
H 13.6036050000 4.5202280000 19.0858560000  
H 11.9332360000 4.4098880000 19.7018750000  
H 12.1949870000 1.5363500000 17.3268470000  
H 11.8456300000 1.9337130000 19.0273080000  
H 13.5156520000 2.0411320000 18.4098470000  
H 6.3157050000 4.8242340000 15.6677200000  
H 5.7608050000 3.4538430000 16.6614030000  
H 5.1503540000 3.6550950000 14.9980490000  
H 7.7628880000 1.0056510000 14.6726700000  
H 6.0337200000 1.3260460000 14.3881390000  
H 6.6420710000 1.1227620000 16.0520630000

**[Mo(GaTMP)<sub>6</sub>]:**

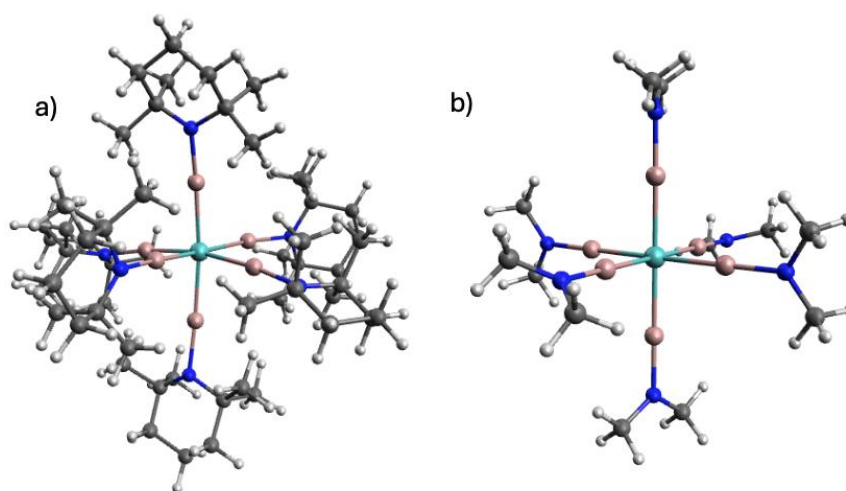

Figure S 22: Optimized structure of a) **2** and b) **2NMe<sub>2</sub>**.

**2 xyz Coordinates:**

Mo -1.0040099031 5.1244944252 7.9708433404  
 Ga 0.6236938715 6.7744001920 7.4118087707  
 Ga -1.4923485639 5.0588761973 5.6451842655  
 Ga -2.7117857684 3.4500624679 8.1140789332  
 Ga -0.3220855460 4.7320644589 10.2425172511  
 Ga 0.7355943818 3.5871958641 7.4304219203  
 Ga -2.4977513878 6.9781768936 8.3005511007  
 N 1.8560925146 8.0335399915 6.7436935581  
 N -1.7708883801 4.9305361204 3.7942314582  
 N -3.9920513729 2.0897476135 7.9009992579  
 N 0.5080917860 4.1878215122 11.8450945436  
 N -3.5528770584 8.5329823580 8.3569198368  
 C 1.4543788624 9.4575732199 6.8566246713  
 C 2.3571472315 10.3452228445 5.9665042697  
 H 2.0966632626 10.1423046603 4.9044477906  
 H 2.1164598097 11.4122814283 6.1596370400  
 C 3.8464111515 10.0635981143 6.1632499318  
 H 4.4531339361 10.7137923205 5.4985062959  
 H 4.1582527585 10.3100644062 7.2016075582  
 C 4.1167029706 8.5908522728 5.8573436452  
 H 5.1933779425 8.3434241291 5.9734773519  
 H 3.8549747957 8.3963778729 4.7940647947  
 C 3.2836748015 7.6298927027 6.7404694406  
 C 0.0096111850 9.5753585545 6.3311576949  
 H -0.3370827234 10.6281917720 6.3508188056  
 H -0.7035264212 8.9896706578 6.9516724422  
 H -0.0563279330 9.1970858702 5.2918688137  
 C 1.4723165074 9.9692868129 8.3210033854  
 H 1.0675143392 11.0002040339 8.3965481850  
 H 2.4917023915 9.9753179708 8.7520221180  
 H 0.8477103868 9.3076014793 8.9575748332  
 C 3.3704396756 6.2235483600 6.1151224361  
 H 4.4237846511 5.8849156361 6.0410017213  
 H 2.9249281763 6.2296601245 5.1006299419  
 H 2.8316610180 5.4577193906 6.7145362676  
 C 3.8854944809 7.5605997694 8.1682972678  
 H 4.9149497472 7.1452759555 8.1553850741

H 3.2576609760 6.9094131019 8.8112118534  
 H 3.9299112208 8.5560392616 8.6493898859  
 C -2.8596625703 4.0392921656 3.3271380984  
 C -2.6201122999 3.6360647305 1.8520753482  
 H -1.7475751588 2.9467855159 1.8234667931  
 H -3.4977553379 3.0622263995 1.4852696075  
 C -2.3242648856 4.8349557826 0.9504860262  
 H -2.1414509894 4.4973518587 -0.0913614617  
 H -3.2039715235 5.5133391596 0.9018154790  
 C -1.1016048048 5.5776129854 1.4889586828  
 H -0.8503312485 6.4545462985 0.8551713075  
 H -0.2265107912 4.8920206373 1.4528652356  
 C -1.2765781618 6.0485397887 2.9538409585  
 C -2.8254422211 2.7568576490 4.1828762726  
 H -3.5688479206 2.0202699946 3.8157991352  
 H -3.0790234715 2.9564150950 5.2467486106  
 H -1.8197500957 2.2912248199 4.1485230818  
 C -4.2675557554 4.6708009834 3.4913994067  
 H -5.0670134426 3.9341123322 3.2665948996  
 H -4.4197941523 5.5418119584 2.8269652802  
 H -4.4041856459 5.0215762188 4.5352026233  
 C 0.1110106971 6.4641480269 3.4815494273  
 H 0.5519880257 7.2587992686 2.8465411833  
 H 0.7986131548 5.5956093375 3.4920239123  
 H 0.0663799454 6.8708691885 4.5147513809  
 C -2.1983124339 7.2940152780 3.0148182393  
 H -1.7613851666 8.1471148798 2.4547856072  
 H -2.3368238928 7.6116239420 4.0692308775  
 H -3.2009021313 7.0939114971 2.5929436140  
 C -3.5604726363 0.6736998776 7.9286818575  
 C -4.3749626220 -0.1416194760 6.8923137796  
 H -4.0435516918 0.1698968075 5.8774796258  
 H -4.1254863508 -1.2193706595 6.9962352816  
 C -5.8828666164 0.0882126980 7.0085380471  
 H -6.2590372846 -0.2959344757 7.9816637535  
 H -6.4198532407 -0.4874763305 6.2255105185  
 C -6.1886578933 1.5805148405 6.8717978042  
 H -7.2790757895 1.7756934388 6.9583308556

H -5.8785137332 1.9184721371 5.8584068931  
C -5.4302063845 2.4411646595 7.9130584130  
C -2.0754162485 0.6141727283 7.5204316200  
H -1.7297390677 -0.4367789087 7.4550038652  
H -1.4241200879 1.1268283618 8.2613044061  
H -1.9154912177 1.0963430289 6.5347950144  
C -3.6731240900 0.0329635493 9.3359555422  
H -3.2061072984 -0.9739082100 9.3487145146  
H -4.7202026729 -0.0831621165 9.6715999043  
H -3.1506645188 0.6680662153 10.0793515310  
C -5.5624160805 3.9198398182 7.5012250608  
H -6.6281919409 4.2197162373 7.4466071919  
H -5.0988444120 4.1012771798 6.5104138454  
H -5.0704121549 4.5917291815 8.2385197463  
C -6.0780256401 2.2955823759 9.3139652065  
H -7.1062313221 2.7135143616 9.3186385265  
H -5.4739321772 2.8435448301 10.0649977955  
H -6.1476157875 1.2423796953 9.6434361805  
C 1.4182521295 5.1289326772 12.5369422783  
C 2.6236973343 4.3556936930 13.1303059422  
H 3.2596400700 4.0159920454 12.2836539833  
H 3.2402545890 5.0514191969 13.7387938158  
C 2.2014603481 3.1334935775 13.9475780941  
H 1.6380576098 3.4482817766 14.8528759911  
H 3.0969636170 2.5919760766 14.3187935731  
C 1.3448303432 2.2083379859 13.0815686081  
H 1.0196441945 1.3119138773 13.6518574291  
H 1.9612167495 1.8448717806 12.2299419296  
C 0.0992467757 2.9219052010 12.4968755933  
C 1.9635761896 6.1246992390 11.4935138927  
H 2.6923741272 6.8189395310 11.9575980977  
H 1.1528082623 6.7469443748 11.0549293028  
H 2.4686969147 5.5909587287 10.6636343442  
C 0.7106516669 5.9599330625 13.6383349111  
H 1.3792061767 6.7594243961 14.0209241507  
H 0.4010674132 5.3472463761 14.5053696288  
H -0.1999957628 6.4361089384 13.2219709978  
C -0.5158949168 2.0025480595 11.4242789628  
H -0.7815813886 1.0175670221 11.8574826287  
H 0.1955262031 1.8372410437 10.5907645732  
H -1.4459569533 2.4385077016 10.9990755592  
C -0.9751555929 3.1244213202 13.5964961054  
H -1.3682729746 2.1480060755 13.9488377089  
H -1.8204627420 3.7159334842 13.1907690058  
H -0.5824154183 3.6607407735 14.4796099945  
C -3.4055521167 9.4683853650 9.4956314155  
C -4.8021682753 9.9128293797 9.9978056487  
H -5.2840856332 9.0362720794 10.4846505828  
H -4.6839552056 10.6936795118 10.7797942784  
C -5.7043371021 10.4040373060 8.8635662042  
H -5.2879674789 11.3315262535 8.4131603061  
H -6.7036576964 10.6812507757 9.2603250532  
C -5.8418908312 9.3137678233 7.7987662079  
H -6.4854885614 9.6563012640 6.9600098702  
H -6.3442919742 8.4309253707 8.2523333600  
C -4.4738785006 8.8466897538 7.2399860601

C -2.5371644311 10.7060757375 9.1507504399  
H -2.3069296734 11.2901884019 10.0658655030  
H -3.0353822348 11.3908956084 8.4403079877  
H -1.5822058478 10.3823533271 8.6934516457  
C -4.7015060983 7.5613280056 6.4221350936  
H -5.4280731856 7.7382031941 5.6043103035  
H -5.0894090971 6.7433887150 7.0626066983  
H -3.7588234207 7.2088962718 5.9508840774  
C -3.8967269601 9.9047900867 6.2640906264  
H -4.5395128535 9.9988614768 5.3643257732  
H -2.8822444443 9.6027495037 5.9366585285  
H -3.8176334675 10.9088188352 6.7196644270  
C -2.6937036902 8.7219890356 10.6407498195  
H -1.6644754374 8.4151634776 10.3504135195  
H -3.2553870829 7.8095612919 10.9300173811  
H -2.6027577945 9.3712685441 11.5347236511  
H 3.8769870714 2.7593594293 9.9304676861  
C 3.1799104212 3.0869444923 9.1324998484  
H 3.5570942370 4.0369995289 8.7033460749  
H 2.2071770383 3.2943822984 9.6292722692  
H 5.0684929398 1.1992101145 8.3171364758  
H 3.0262975238 0.4430464611 9.6025024586  
H 4.9901105143 2.6721030350 7.3099331406  
C 4.4869158621 1.7017732913 7.5150539177  
C 3.0617505442 2.0045468320 8.0398941738  
C 2.4529952533 0.7401398818 8.6995374727  
H 1.4074920359 0.9457833835 9.0074495582  
C 4.4800899059 0.8727661890 6.2309488496  
H 2.4321370865 -0.1280497456 8.0143993563  
H 5.5186087935 0.6928022846 5.8818555222  
N 2.2209567804 2.5443229126 6.9446908498  
H 4.0414348690 -0.1313214610 6.4190829388  
C 3.6810905182 1.6149700629 5.1601093771  
H 4.1873732974 2.5819743335 4.9466049774  
C 2.2280472160 1.9242392556 5.5976824112  
H 1.7556093549 -0.1802954451 6.1390589621  
H 2.2084036144 3.8962417206 4.6426131656  
C 1.3554262072 0.6448328460 5.5205161815  
H 3.6584946635 1.0460123525 4.2062430814  
C 1.6450662381 2.9435784715 4.5994053614  
H 0.3316505108 0.8674244598 5.8835460034  
H 0.5768179920 3.1707897918 4.8056107865  
H 1.2793387312 0.2743387733 4.4768148906  
H 1.6900711083 2.5515809257 3.5633356391

**2<sub>NMe2</sub> xyz Coordinates:**

Mo -0.7424650016 5.0773824570 7.6018918863  
Ga 0.9337347424 6.7982788000 7.3014933744  
Ga -1.3131041590 5.2232999193 5.2539878080  
Ga -2.4280831163 3.3683485955 7.9044233666  
Ga -0.1789219872 4.9175233866 9.9499529581  
Ga 0.8917827461 3.3760556775 7.0642883623  
Ga -2.3800745038 6.7796580258 8.1307987220  
N 2.2169808259 8.1272303391 7.0773056192  
N -1.7514482205 5.3180932974 3.4481599896  
N -3.7289192271 2.0600468618 8.1460069301

N 0.2507364902 4.7896704796 11.7560910797  
N -3.6215513840 8.1055355254 8.5341432869  
C 1.8812261540 9.5334023328 6.9796045703  
C 3.6339450746 7.8402182440 6.9802074573  
C -1.5847106025 6.5243426625 2.6627483761  
C -3.4134109632 0.6490206262 8.2409868371  
C -5.1412020028 2.3678759808 8.2458590302  
C 1.4788498068 5.3227150576 12.3109287651  
C -0.6210373494 4.1559116581 12.7248356060  
C -3.4686584504 8.9953992227 9.6678274361  
C -4.8263050257 8.3208151209 7.7589595000  
C 2.7330891545 1.1822852726 7.6081750130  
N 2.1249753890 2.0543551757 6.6237709163  
C 2.5712564379 1.8283545197 5.2635805435  
H 2.3479223638 1.4063947160 8.6257589074  
H 3.8461987383 1.2922247222 7.6432259445  
H 2.5222140243 0.1025771851 7.4038675665  
H 2.0649191457 2.5242304222 4.5611026126  
H 2.3521940398 0.7882269511 4.9143058855  
H 3.6734512262 1.9829242053 5.1467816949  
H -4.3095297385 8.8985666247 10.3997176167  
H -3.4296907703 10.0706614189 9.3605049721  
H -2.5282152254 8.7759791436 10.2171029908  
H -4.8796055890 7.6101735983 6.9065912642  
H -4.8749030372 9.3540110764 7.3322042316  
H -5.7545819167 8.1794361187 8.3678991989  
H 3.8219951025 6.7482568192 7.0596866680  
H 4.2237030555 8.3380189080 7.7904613870  
H 4.0699161316 8.1816279594 6.0079259095  
H 2.2062814786 9.9800782216 6.0064279468  
H 2.3596910500 10.1402800400 7.7885447395  
H 0.7835015745 9.6837875677 7.0605370973  
H -2.3181104776 0.4829205173 8.1578696068  
H -3.9018031118 0.0495770483 7.4320810643  
H -3.7431012384 0.2061838109 9.2143093160  
H -5.3129536331 3.4627113025 8.1681766263  
H -5.5798372487 2.0320037140 9.2189367471  
H -5.7403477008 1.8799290292 7.4364030221  
H -1.5406123053 3.7697875535 12.2352677826  
H -0.9457440425 4.8624212411 13.5297735108  
H -0.1286606914 3.2900350113 13.2349471879  
H 2.0974669107 5.7953958507 11.5183633163  
H 2.1053872190 4.5304745657 12.7927648175  
H 1.2876141206 6.1020632144 13.0909722809  
H -0.8959133158 6.3718101947 1.7945034027  
H -1.1575474907 7.3423513832 3.2817330961  
H -2.5537801221 6.8966775803 2.2449580626  
C -2.3125558872 4.1989486848 2.7191098031  
H -1.6771794747 3.8985987946 1.8483010581  
H -3.3302872001 4.4252107959 2.3122257069  
H -2.4113375220 3.3090752287 3.37691854
